# Supplementary material for: Chelate-free “turn-on”-type fluorescence detection of trivalent metal ions
Source: Royal Society of Chemistry journal article supplement (doi:10.1039/d2cc04815a), 2022-01-01
Supplement: d2cc04815a1.pdf [file d2cc04815a1.pdf]

## **Chelate-Free “Turn-ON” -Type Fluorescence Detection of Trivalent Metal Ions**

Shota Matsumoto,<sup>[a]</sup> Tomohiro Umeno,<sup>[a]</sup> Noriko Suzuki,<sup>[a]</sup> Kazuteru Usui,<sup>[a]</sup> Masatoshi Kawahata,<sup>[a]</sup> and Satoru Karasawa\*<sup>[a]</sup>

[a] Faculty of Pharmaceutical Sciences, Showa Pharmaceutical University, 3-3165 Higashi-tamagawagakuen, Machida 194-8543, Japan. karasawa@ac.shoyaku.ac.jp (S.K.)

## Table of Contents

|                                                                                                        |    |
|--------------------------------------------------------------------------------------------------------|----|
| General Information.....                                                                               | 3  |
| <sup>1</sup> H, <sup>13</sup> C and <sup>19</sup> F-NMR .....                                          | 3  |
| IR spectra.....                                                                                        | 3  |
| HRMS.....                                                                                              | 3  |
| UV-vis and Fluorescence Spectroscopy and Fluorescence Quantum Yield Measurements .....                 | 3  |
| X-ray Crystallography .....                                                                            | 3  |
| pKa Determination.....                                                                                 | 3  |
| Materials.....                                                                                         | 3  |
| Experimental .....                                                                                     | 4  |
| Photophysical properties in various solvents with different polarities.....                            | 6  |
| pH-dependent absorption and fluorescence spectral change and determination of pKa of INA analogs ..... | 7  |
| The absorption and fluorescence spectral changes upon additions of various metal ions .....            | 11 |
| The competition assessments of the trivalent ions against the divalent ions .....                      | 14 |
| X-Ray Crystallography Data .....                                                                       | 15 |
| IR Spectra .....                                                                                       | 17 |
| NMR Spectra.....                                                                                       | 19 |
| References .....                                                                                       | 26 |

## General Information

### <sup>1</sup>H, <sup>13</sup>C and <sup>19</sup>F-NMR

The proton (<sup>1</sup>H), carbon-13 (<sup>13</sup>C), and fluorine-19 (<sup>19</sup>F) nuclear magnetic resonance (NMR) spectra were measured on a Bruker Biospin AVANCE II 600 or III 300 spectrometer employing CDCl<sub>3</sub>, CD<sub>3</sub>OD, or Acetone-*d*<sub>6</sub> as the solvent. Chemical shifts (δ) are reported in parts per million (ppm). For <sup>1</sup>H NMR spectra (CDCl<sub>3</sub>), tetramethylsilane was used as the internal reference (0.00 ppm), while the central solvent peak as the reference (77.0 ppm in CDCl<sub>3</sub>, 49.0 ppm in CD<sub>3</sub>OD and 29.9 ppm in Acetone-*d*<sub>6</sub>) for <sup>13</sup>C NMR spectra.

### IR spectra

The infrared (IR) spectra for the samples were recorded by the tablet method using KBr or the thin-film method using NaCl plates on a JASCO FT/IR-420 spectrometer.

### HRMS

The high-resolution electrospray ionization mass spectra were recorded on a JEOL JMS-T 100LP spectrometer.

### UV-vis and Fluorescence Spectroscopy and Fluorescence Quantum Yield Measurements

The ultraviolet-visible (UV-vis) spectra of the solutions were recorded on JASCO V-760 spectrometers. The fluorescence spectra and fluorescence quantum yield of solutions were determined on a JASCO FP-8500 spectrofluorimeter that was equipped with a calibrated integrating sphere system.

### X-ray Crystallography

The single-crystal X-ray diffraction data were collected on a Rigaku XtaLAB Synergy Custom and RA-Micro7 HFM diffractometers, which were equipped with graphite-monochromated Cu Kα radiation (λ = 1.54187 Å) and HyPix-6000HE detector at 93 ± 1 K. The structure was solved with the ShelXT<sup>[1]</sup> structure solution program using the Intrinsic Phasing solution method and by using Olex2<sup>[2]</sup> as the graphical interface. The model was refined with ShelXL<sup>[3]</sup> using Least Squares minimisation. The non-hydrogen atoms were refined anisotropically, whereas the hydrogen atoms were refined isotropically or, for those bonded to C atoms, using a riding model. Crystallographic data files (CIF) for the structures reported in this paper have been deposited with the Cambridge Crystallographic Data Center (CCDC) as supplementary publication nos. CCDC-2194442 for **INA-DEA** and CCDC-2194212 for [Al<sup>III</sup>(H<sub>2</sub>O)<sub>6</sub> [**INA-DMA-H**]<sup>+</sup>]<sub>2</sub>]Cl<sub>5</sub>.

### pKa Determination

The pKa values were determined via UV-vis spectroscopy, as described in our previous work.<sup>[4]</sup> The 20 μM solutions **INA** analogs containing 30% (v/v) 1,4-dioxane/buffer were used as the working solutions. Buffer solutions with different pH values were prepared using the Britton-Robinson buffer (pH 2-13) and the HCl-KCl (pH 1-2) buffer. The pH of the buffer solutions was monitored by a HORIBA D-51 pH meter equipped with a glass electrode (HORIBA 9681S-10D). The pKa values of **INA** analogs were worked out by nonlinear regression (Igor Pro 9) using eq 1 as reported.<sup>[5]</sup>

$$\text{Absorbance total} = \frac{\epsilon_{\text{HA}} - \epsilon_{\text{A}^-} \times [10^{(\text{pH}-\text{pKa})}]}{1 + 10^{(\text{pH}-\text{pKa})}} \times [\text{S}_t] \quad (1)$$

where  $\epsilon_{\text{HA}}$  and  $\epsilon_{\text{A}^-}$  are the extinction coefficients of the acid and base forms of the compound, respectively, and  $[\text{S}_t]$  is the total compound concentration.

### Materials

Analytical thin layer chromatography (TLC) was performed with Merck Millipore pre-coated TLC plates, silica gel 60 F254, layer thickness 0.25 mm. Compounds were observed in UV-light at 254 nm. Flash chromatography separations were performed on Kanto Chemical silica gel 60N, spherical neutral, particle size 40-50 μm. Reagents and solvents were commercial grade and were used as supplied, unless otherwise noted.

## Experimental

**Scheme S1.** Synthetic routes of **INA** analogs.

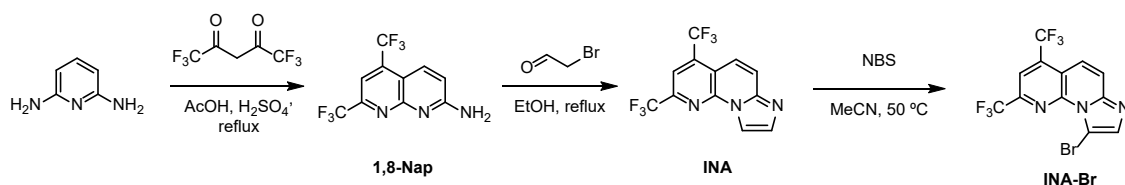

### General Procedure A

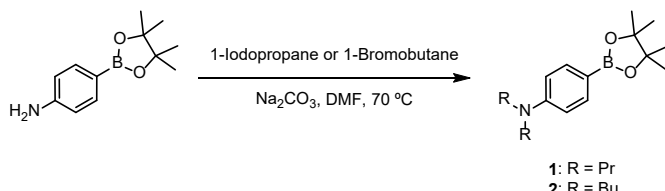

### General Procedure B

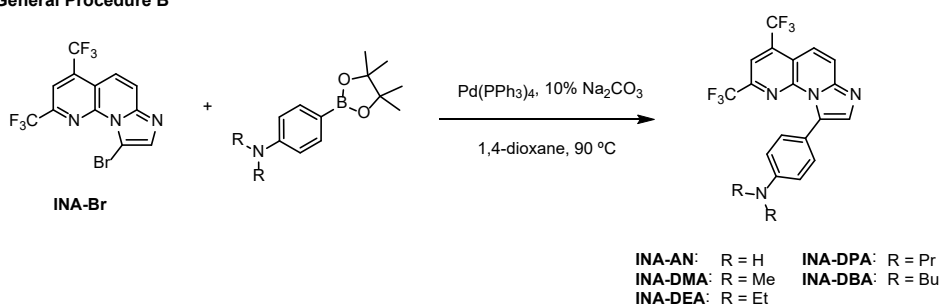

We synthesized 5,7-bis(trifluoromethyl)-1,8-naphthyridin-2-amine (**18-Nap**), 2,4-bis(trifluoromethyl)imidazo[1,2-*a*][1,8]naphthyridine (**INA**), 9-bromo-2,4-bis(trifluoromethyl)imidazo[1,2-*a*][1,8]naphthyridine (**INA-Br**), 9-phenyl-2,4-bis(trifluoromethyl)imidazo[1,2-*a*][1,8]naphthyridine (**INA-Ph**) and 4-(2,4-bis(trifluoromethyl)imidazo[1,2-*a*][1,8]naphthyridin-9-yl)-*N,N*-dimethylaniline (**INA-DMA**) using previously reported methods.<sup>[4,6-7]</sup>

#### General Procedure A (Synthesis of **1-2**):

To a DMF (0.37 M) solution containing 4-(4,4,5,5-tetramethyl-1,3,2-dioxaborolan-2-yl)aniline (1.0 equiv) and Na<sub>2</sub>CO<sub>3</sub> (2.0 equiv), 1-iodopropane (4.0 equiv) or 1-bromobutane (4.0 equiv) was added and heated 70 °C for 1.5–3 h. The resulting mixture was extracted three times with *n*-Hexane/AcOEt (4:1, v/v), and the combined organic layer was dried successively over Na<sub>2</sub>SO<sub>4</sub> and in a vacuum. Further, the residue was purified by flash column chromatography on silica gel to give **1-2**.

#### General Procedure B (Synthesis of **INA-DEA**, **INA-DPA** and **INA-DPA**):

A 10% Na<sub>2</sub>CO<sub>3</sub> aqueous solution was added to a 1,4-dioxane solution (0.1 M) of **INA-Br** (1.0 equiv), dioxaborolane (1.1 or 1.2 equiv), and tetrakis(triphenylphosphine) palladium (0) (5 or 10 mol%) in an N<sub>2</sub> atmosphere and stirred for 1–16 h at 90 °C. The resulting mixture was extracted three times with CH<sub>2</sub>Cl<sub>2</sub>, and the combined organic layer was dried successively over Na<sub>2</sub>SO<sub>4</sub> and in a vacuum. Further, the residue was purified by flash column chromatography on silica gel to give **INA** derivatives.

#### Synthesis of *N,N*-dipropyl-4-(4,4,5,5-tetramethyl-1,3,2-dioxaborolan-2-yl)aniline (**1**):

By following general procedure A, the reaction of 4-(4,4,5,5-tetramethyl-1,3,2-dioxaborolan-2-yl)aniline (1.0 g, 4.6 mmol) yielded the desired product **1** (857 mg, 61%) as a white solid.

*R*<sub>f</sub> = 0.41 (*n*-hexane/AcOEt 9:1); m.p. 74–75 °C; <sup>1</sup>H NMR (300 MHz, Acetone-*d*<sub>6</sub>) δ 7.54 (d, *J* = 8.9 Hz, 2H), 6.64 (d, *J* = 8.9 Hz, 2H), 3.31 (t, *J* = 7.7 Hz, 4H), 1.61 (sext, *J* = 7.5 Hz, 4H), 1.28 (s, 12H), 0.92 (t, *J* = 7.4 Hz, 6H); <sup>13</sup>C NMR (151 MHz, Acetone-*d*<sub>6</sub>) δ 151.3, 137.1, 114.8, 111.4, 83.6, 53.0, 25.2, 21.0, 11.5; IR (KBr): 3087, 2972, 2934, 2876, 1602, 1360, 1143 cm<sup>-1</sup>; HRMS (ESI): *m/z* calcd for C<sub>18</sub>H<sub>30</sub>BNO<sub>2</sub>+H<sup>+</sup>: 304.2448 [*M*+H]<sup>+</sup>; found: 304.2441.

#### Synthesis of *N,N*-dibutyl-4-(4,4,5,5-tetramethyl-1,3,2-dioxaborolan-2-yl)aniline (**2**):

By following general procedure A, the reaction of 4-(4,4,5,5-tetramethyl-1,3,2-dioxaborolan-2-yl)aniline (200 mg, 913 μmol) yielded the desired product **2** (166 mg, 55%) as a colorless oil.

*R*<sub>f</sub> = 0.37 (*n*-hexane/diethyl ether 9:1); <sup>1</sup>H NMR (300 MHz, Acetone-*d*<sub>6</sub>) δ 7.55 (d, *J* = 8.9 Hz, 2H), 6.64 (d, *J* = 8.9 Hz, 2H), 3.34 (t, *J* = 7.6 Hz, 4H), 1.63–1.49 (m, 4H), 1.43–1.28 (m, 16H), 0.95 (t, *J* = 7.3 Hz, 6H); <sup>13</sup>C NMR (151 MHz, Acetone-*d*<sub>6</sub>) δ 151.2, 137.1, 114.8, 111.4, 83.6, 51.0, 30.1, 25.2, 20.8, 14.3; IR (NaCl): 3091, 2957, 2931, 2872, 1604, 1361, 1143 cm<sup>-1</sup>; HRMS (ESI): *m/z* calcd for C<sub>20</sub>H<sub>34</sub>BNO<sub>2</sub>+H<sup>+</sup>: 332.2761 [*M*+H]<sup>+</sup>; found: 332.2770.

#### Synthesis of 4-(2,4-bis(trifluoromethyl)imidazo[1,2-*a*][1,8]naphthyridin-9-yl)-*N,N*-diethylaniline (**INA-DEA**):

By following general procedure B, the reaction of **INA-Br** (25 mg, 65  $\mu\text{mol}$ ) yielded the desired product **INA-DEA** (24 mg, 83%) as a reddish solid.

$R_f$  = 0.37 (*n*-hexane/AcOEt 3:1); m.p. 107–109 °C;  $^1\text{H}$  NMR (300 MHz,  $\text{CD}_3\text{OD}$ )  $\delta$  8.14 (s, 1H), 7.86 (s, 2H), 7.52 (s, 1H), 7.35 (d,  $J$  = 8.9 Hz, 2H), 6.72 (d,  $J$  = 9.0 Hz, 2H), 3.44 (q,  $J$  = 7.0 Hz, 4H), 1.20 (t,  $J$  = 7.0 Hz, 6H);  $^{13}\text{C}$  NMR (151 MHz,  $\text{CD}_3\text{OD}$ )  $\delta$  149.2, 146.8, 145.9, 145.5 (q,  $J$  = 34.1 Hz), 137.9 (q,  $J$  = 34.1 Hz), 134.3, 133.7, 132.4, 124.0 (q,  $J$  = 274.7 Hz), 123.4, 121.9 (q,  $J$  = 274.4 Hz), 120.3, 119.5, 118.2, 115.0, 112.2, 45.6, 12.8;  $^{19}\text{F}$  NMR (282 MHz,  $\text{CDCl}_3$ )  $\delta$  -60.90 (d,  $J$  = 1.8 Hz), -67.11; IR (KBr): 3042, 2974, 2935, 1612, 1492, 1402, 1282, 1136  $\text{cm}^{-1}$ ; HRMS (ESI):  $m/z$  calcd for  $\text{C}_{22}\text{H}_{18}\text{F}_6\text{N}_4+\text{H}^+$ : 453.1514 [ $M+\text{H}$ ] $^+$ ; found, 453.1551.

Synthesis of 4-(2,4-bis(trifluoromethyl)imidazo[1,2-*a*][1,8]naphthyridin-9-yl)-*N,N*-dipropylaniline (**INA-DPA**):

By following general procedure B, the reaction of **INA-Br** (20 mg, 52  $\mu\text{mol}$ ) yielded the desired product **INA-DPA** (23 mg, 94%) as a reddish solid.

$R_f$  = 0.50 (*n*-hexane/AcOEt 1:1); m.p. 83–85 °C;  $^1\text{H}$  NMR (300 MHz, Acetone- $d_6$ )  $\delta$  8.24 (s, 1H), 7.96 (d,  $J$  = 9.7 Hz, 1H), 7.85 (qd,  $J$  = 1.9, 9.7 Hz, 1H), 7.61 (s, 1H), 7.50 (d,  $J$  = 8.6 Hz, 2H), 6.81 (br, 2H), 3.42 (t,  $J$  = 7.6 Hz, 4H), 1.72 (sext,  $J$  = 7.4 Hz, 4H), 0.99 (t,  $J$  = 7.4 Hz, 6H);  $^{13}\text{C}$  NMR (151 MHz, Acetone- $d_6$ )  $\delta$  149.0, 146.7, 145.5, 144.3 (q,  $J$  = 36.8 Hz), 136.9 (q,  $J$  = 32.8 Hz), 134.8, 133.4, 132.1, 124.4, 123.7 (q,  $J$  = 274.5 Hz), 123.5 (q,  $J$  = 457.2 Hz), 119.4, 118.8, 118.0, 114.5, 111.5, 53.4, 21.0, 11.5;  $^{19}\text{F}$  NMR (282 MHz, Acetone- $d_6$ )  $\delta$  -61.43 (d,  $J$  = 1.7 Hz), -67.44; IR (KBr): 3034, 2963, 2935, 2876, 1611, 1492, 1282, 1138  $\text{cm}^{-1}$ ; HRMS (ESI):  $m/z$  calcd for  $\text{C}_{24}\text{H}_{22}\text{F}_6\text{N}_4+\text{H}^+$ : 481.1827 [ $M+\text{H}$ ] $^+$ ; found: 481.1846.

Synthesis of 4-(2,4-bis(trifluoromethyl)imidazo[1,2-*a*][1,8]naphthyridin-9-yl)-*N,N*-dibutylaniline (**INA-DBA**):

By following general procedure B, the reaction of **INA-Br** (155 mg, 469  $\mu\text{mol}$ ) yielded the desired product **INA-DBA** (122 mg, 61%) as a reddish solid.

$R_f$  = 0.70 (*n*-hexane/AcOEt 1:1); m.p. 75–77 °C;  $^1\text{H}$  NMR (300 MHz, Acetone- $d_6$ )  $\delta$  8.20 (s, 1H), 7.92 (d,  $J$  = 9.7 Hz, 1H), 7.81 (qd,  $J$  = 1.9, 9.7 Hz, 1H), 7.59 (s, 1H), 7.46 (d,  $J$  = 8.9 Hz, 2H), 6.75 (d,  $J$  = 8.8 Hz, 2H), 3.41 (t,  $J$  = 7.6 Hz, 4H), 1.66 (quin,  $J$  = 7.6 Hz, 4H), 1.41 (sext,  $J$  = 7.4 Hz, 4H), 0.98 (t,  $J$  = 7.3 Hz, 6H);  $^{13}\text{C}$  NMR (151 MHz, Acetone- $d_6$ )  $\delta$  148.0, 145.7, 144.6, 143.3 (q,  $J$  = 36.8 Hz, 1C), 135.9 (q,  $J$  = 32.9 Hz, 1C), 133.8, 132.6, 131.0, 123.4, 122.7 (q,  $J$  = 274.6 Hz), 122.5 (q,  $J$  = 458.0 Hz), 118.4, 117.7, 116.9, 113.5, 110.6, 50.4, 29.2, 19.9, 13.3;  $^{19}\text{F}$  NMR (282 MHz, Acetone- $d_6$ )  $\delta$  -61.43 (d,  $J$  = 1.8 Hz), -67.39; IR (KBr): 3046, 2958, 2932, 2874, 1609, 1490, 1282, 1137  $\text{cm}^{-1}$ ; HRMS (ESI):  $m/z$  calcd for  $\text{C}_{26}\text{H}_{26}\text{F}_6\text{N}_4+\text{H}^+$ : 509.2140 [ $M+\text{H}$ ] $^+$ ; found: 509.2123.

## Photophysical properties in various solvents with different polarities.

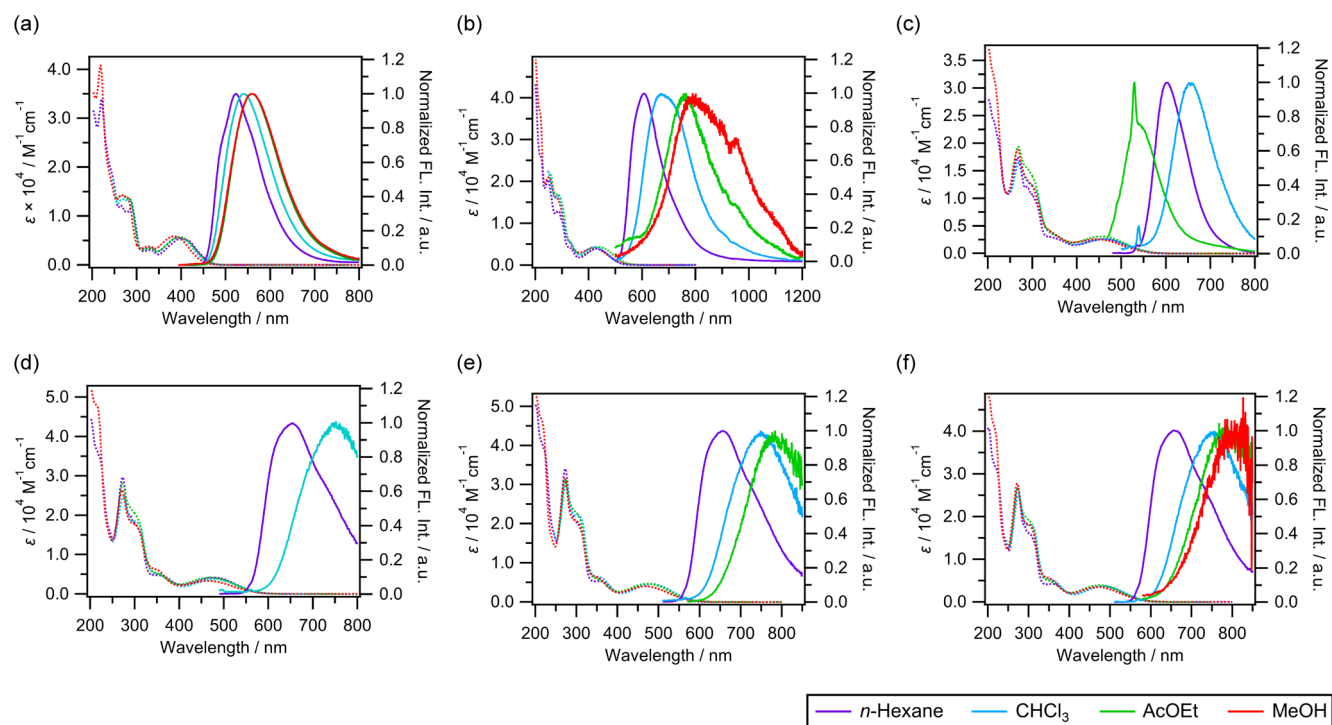

**Figure S1.** Absorption (dotted lines on the left axis) and fluorescence (solid lines on the right axis) spectra of (a) **INA-Ph**, (b) **-AN**, (c) **-DMA**, (d) **-DEA**, (e) **-DPA**, (f) **-DBA** in various solvents (20  $\mu\text{M}$ ). The purple, sky-blue, light green, and red lines indicate conditions using *n*-hexane,  $\text{CHCl}_3$ , AcOEt, and MeOH, respectively.

**Table S1.** Values of absorption maxima ( $\lambda_{\text{max}}^{\text{Ab}}$ ), fluorescence maxima ( $\lambda_{\text{max}}^{\text{Fl}}$ )<sup>[a]</sup> and fluorescence quantum yield ( $\Phi^{\text{Fl}}$ )<sup>[a]</sup> of **INA** analogs

| INAs        | <i>n</i> -Hexane                   |                                    |                      | $\text{CHCl}_3$                    |                                    |                      | AcOEt                              |                                    |                      | MeOH                               |                                    |                      |
|-------------|------------------------------------|------------------------------------|----------------------|------------------------------------|------------------------------------|----------------------|------------------------------------|------------------------------------|----------------------|------------------------------------|------------------------------------|----------------------|
|             | $\lambda_{\text{max}}^{\text{Ab}}$ | $\lambda_{\text{max}}^{\text{Fl}}$ | $\Phi^{\text{Fl}}\%$ |
| <b>-Ph</b>  | 399                                | 523                                | 76.6                 | 393                                | 540                                | 61.5                 | 398                                | 559                                | 41.2                 | 383                                | 560                                | 27.3                 |
| <b>-AN</b>  | 427                                | 608                                | 11.5                 | 423                                | 672                                | 1.7                  | 440                                | 765                                | <0.1                 | 420                                | 790                                | <0.1                 |
| <b>-DMA</b> | 462                                | 603                                | 4.4                  | 463                                | 653                                | 0.5                  | 457                                | 537                                | 14.0                 | 444                                | n.d. <sup>[b]</sup>                | n.d. <sup>[b]</sup>  |
| <b>-DEA</b> | 479                                | 654                                | 4.9                  | 479                                | 753                                | 0.5                  | 471                                | n.d. <sup>[b]</sup>                | n.d. <sup>[b]</sup>  | 465                                | n.d. <sup>[b]</sup>                | n.d. <sup>[b]</sup>  |
| <b>-DPA</b> | 483                                | 659                                | 5.4                  | 483                                | 749                                | 0.7                  | 472                                | 784                                | 0.5                  | 468                                | n.d. <sup>[b]</sup>                | n.d. <sup>[b]</sup>  |
| <b>-DBA</b> | 485                                | 658                                | 0.7                  | 485                                | 756                                | <0.1                 | 476                                | 769                                | <0.1                 | 468                                | 804                                | <0.1                 |

[a] Excited at absorption maxima. [b] n.d.: not determined.

## pH-dependent absorption and fluorescence spectral change and determination of pKa of INA analogs

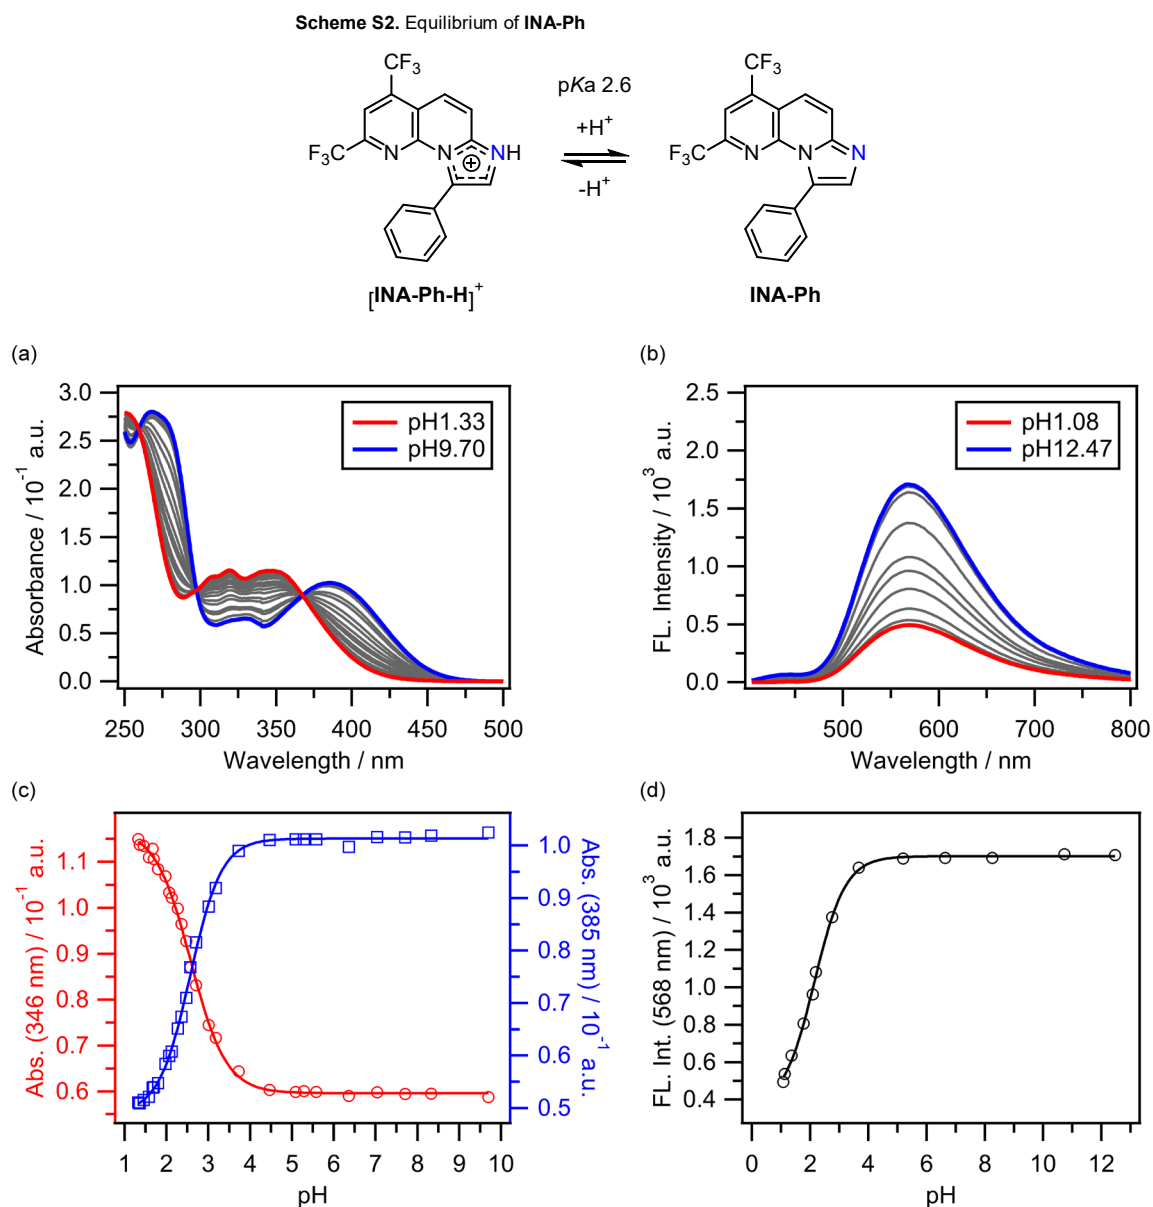

**Figure S2.** pH titrations of **INA-Ph** in 1,4-dioxane/buffer (3:7, v/v) solutions (20  $\mu$ M). (a) and (b) represent absorption and fluorescence spectral changes. (c) and (d) are plots of absorption and fluorescence spectral changes as a function of pH values.

**Table S2.** Values of absorption maxima ( $\lambda_{\max}^{\text{Ab}}$ ), fluorescence maxima ( $\lambda_{\max}^{\text{Fl}}$ )<sup>[a]</sup> and fluorescence quantum yield ( $\phi^{\text{Fl}}$ )<sup>[a]</sup> of **INA-Ph**<sup>[b]</sup> and **[INA-Ph-H]<sup>+</sup>**<sup>[c]</sup>.

|                                   | <b>[INA-Ph-H]<sup>+</sup></b> | <b>INA-Ph</b> |
|-----------------------------------|-------------------------------|---------------|
| $\lambda_{\max}^{\text{Ab}}$ / nm | 346                           | 385           |
| $\lambda_{\max}^{\text{Fl}}$ / nm | 568                           | 569           |
| $\phi^{\text{Fl}}$ %              | 14.2                          | 7.3           |

[a] Excited at 385 nm. [b] pH 12.47. [c] pH 1.08.

**Scheme S3.** Equilibrium of **INA-DMA**

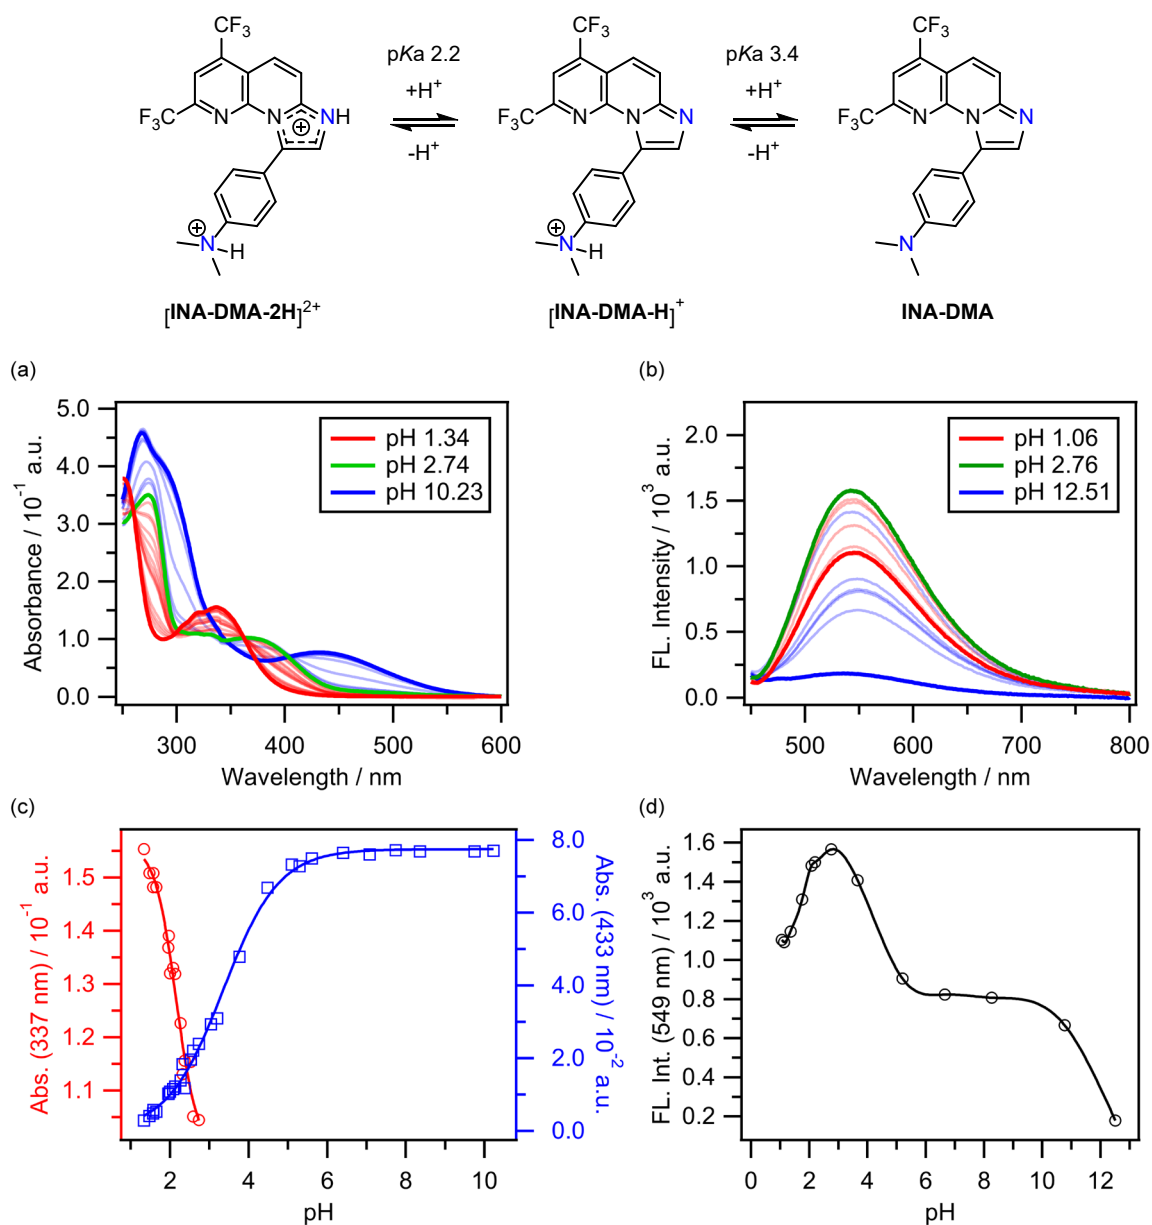

**Figure S3.** pH titrations of **INA-DMA** in 1,4-dioxane/buffer (3:7, v/v) solutions (20  $\mu$ M). (a) and (b) represent absorption and fluorescence spectral changes. (c) and (d) are plots of absorption and fluorescence spectral changes as a function of pH values.

**Table S3.** Values of absorption maxima ( $\lambda_{\max}^{\text{Ab}}$ ), fluorescence maxima ( $\lambda_{\max}^{\text{Fl}}$ )<sup>[a]</sup> and fluorescence quantum yield ( $\phi^{\text{Fl}}$ )<sup>[a]</sup> of **INA-DMA**,<sup>[b]</sup> **[INA-DMA-H]<sup>+</sup>**<sup>[c]</sup> and **[INA-DMA-2H]<sup>2+</sup>**<sup>[d]</sup>.

|                                   | <b>[INA-DMA-2H]<sup>2+</sup></b> | <b>[INA-DMA-H]<sup>+</sup></b> | <b>INA-DMA</b> |
|-----------------------------------|----------------------------------|--------------------------------|----------------|
| $\lambda_{\max}^{\text{Ab}}$ / nm | 337                              | 371                            | 433            |
| $\lambda_{\max}^{\text{Fl}}$ / nm | 545                              | 549                            | 537            |
| $\phi^{\text{Fl}}$ %              | 1.1                              | 1.1                            | 0.3            |

[a] Excited at 371 nm. [b] pH 12.51. [c] pH 2.76. [d] pH 1.06.



**Scheme S4.** Equilibrium of **INA-DPA**

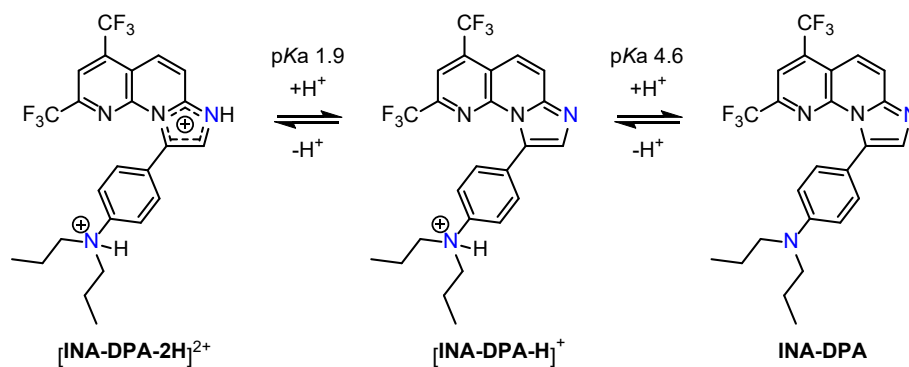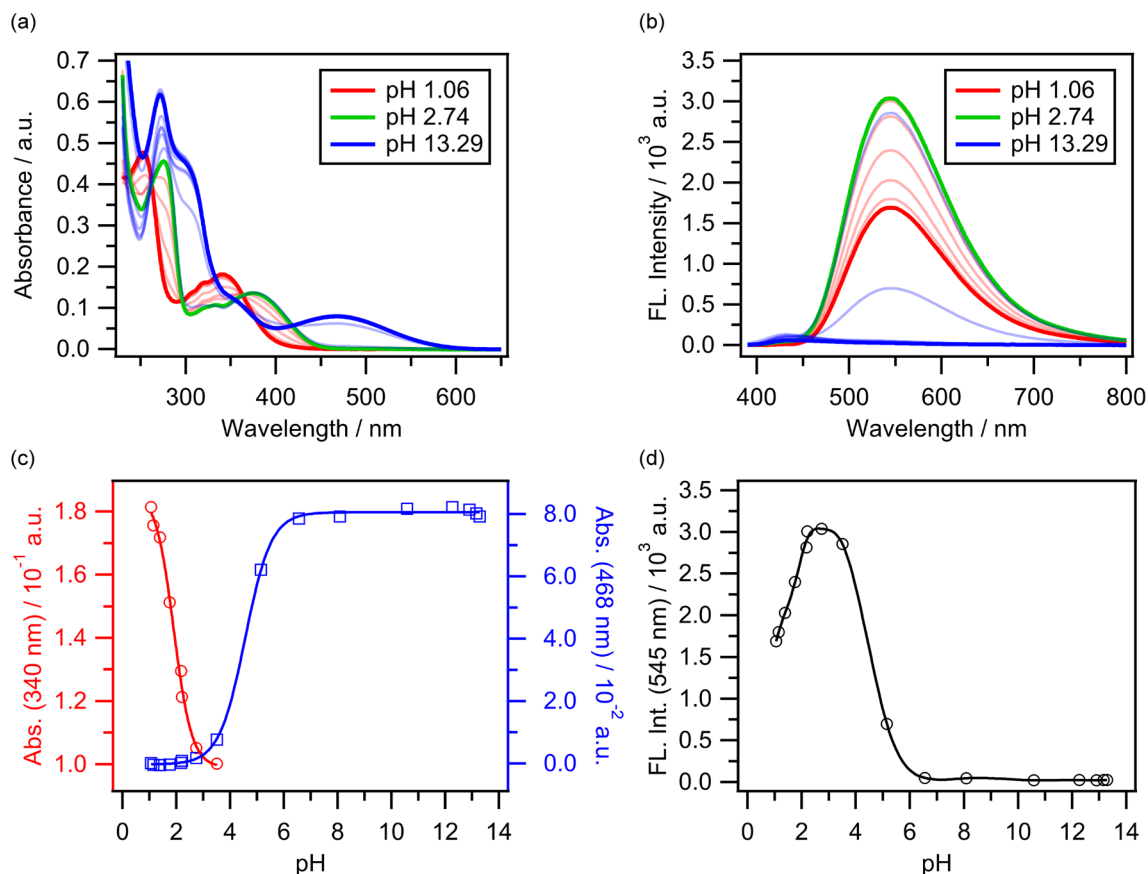

**Figure S4.** pH titrations of **INA-DPA** in 1,4-dioxane/buffer (3:7, v/v) solutions (20  $\mu\text{M}$ ). (a) and (b) represent absorption and fluorescence spectral changes. (c) and (d) are plots of absorption and fluorescence spectral changes as a function of pH values.

**Table S4.** Values of absorption maxima ( $\lambda_{\text{max}}^{\text{Ab}}$ ), fluorescence maxima ( $\lambda_{\text{max}}^{\text{Fl}}$ )<sup>[a]</sup> and fluorescence quantum yield ( $\phi^{\text{Fl}}$ )<sup>[a]</sup> of **INA-DPA**,<sup>[b]</sup> **[INA-DPA-H]<sup>+</sup>** <sup>[c]</sup> and **[INA-DPA-2H]<sup>2+</sup>**.<sup>[d]</sup>

|                                         | <b>[INA-DPA-2H]<sup>2+</sup></b> | <b>[INA-DPA-H]<sup>+</sup></b> | <b>INA-DPA</b> |
|-----------------------------------------|----------------------------------|--------------------------------|----------------|
| $\lambda_{\text{max}}^{\text{Ab}}$ / nm | 340                              | 374                            | 468            |
| $\lambda_{\text{max}}^{\text{Fl}}$ / nm | 545                              | 545                            | 432            |
| $\phi^{\text{Fl}}$ %                    | 15.4                             | 17.6                           | 1.1            |

[a] Excited at 374 nm. [b] pH 13.29. [c] pH 2.74. [d] pH 1.06.

**Scheme S5.** Equilibrium of **INA-DBA**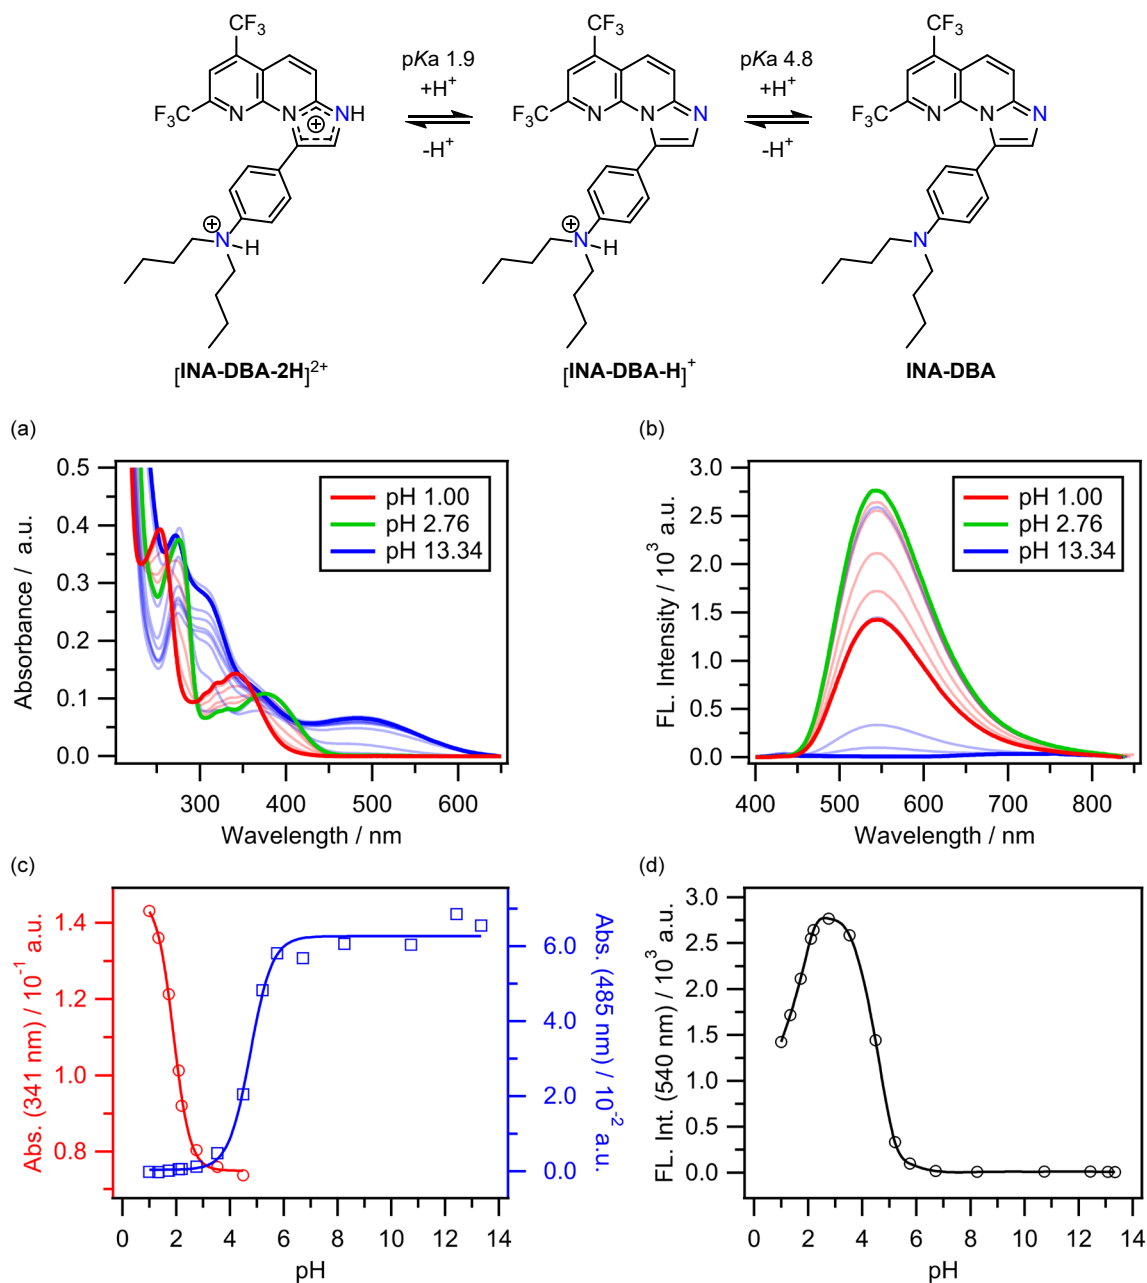**Figure S5.** pH titrations of **INA-DBA** in 1,4-dioxane/buffer (3:7, v/v) solutions (20  $\mu$ M). (a) and (b) represent absorption and fluorescence spectral changes. (c) and (d) are plots of absorption and fluorescence spectral changes as a function of pH values.**Table S5.** Values of absorption maxima ( $\lambda_{\max}^{\text{Ab}}$ ), fluorescence maxima ( $\lambda_{\max}^{\text{Fl}}$ )<sup>[a]</sup> and fluorescence quantum yield ( $\phi^{\text{Fl}}$ )<sup>[a]</sup> of **INA-DBA**,<sup>[b]</sup> **[INA-DBA-H]<sup>+</sup>**<sup>[c]</sup> and **[INA-DBA-2H]<sup>2+</sup>**.<sup>[d]</sup>

|                                   | <b>[INA-DBA-2H]<sup>2+</sup></b> | <b>[INA-DBA-H]<sup>+</sup></b> | <b>INA-DBA</b> |
|-----------------------------------|----------------------------------|--------------------------------|----------------|
| $\lambda_{\max}^{\text{Ab}}$ / nm | 341                              | 377                            | 485            |
| $\lambda_{\max}^{\text{Fl}}$ / nm | 546                              | 540                            | 436            |
| $\phi^{\text{Fl}}$ %              | 17.8                             | 19.3                           | 0.3            |

[a] Excited at 377 nm. [b] pH 13.34. [c] pH 2.76. [d] pH 1.00.

## The absorption and fluorescence spectral changes upon additions of various metal ions

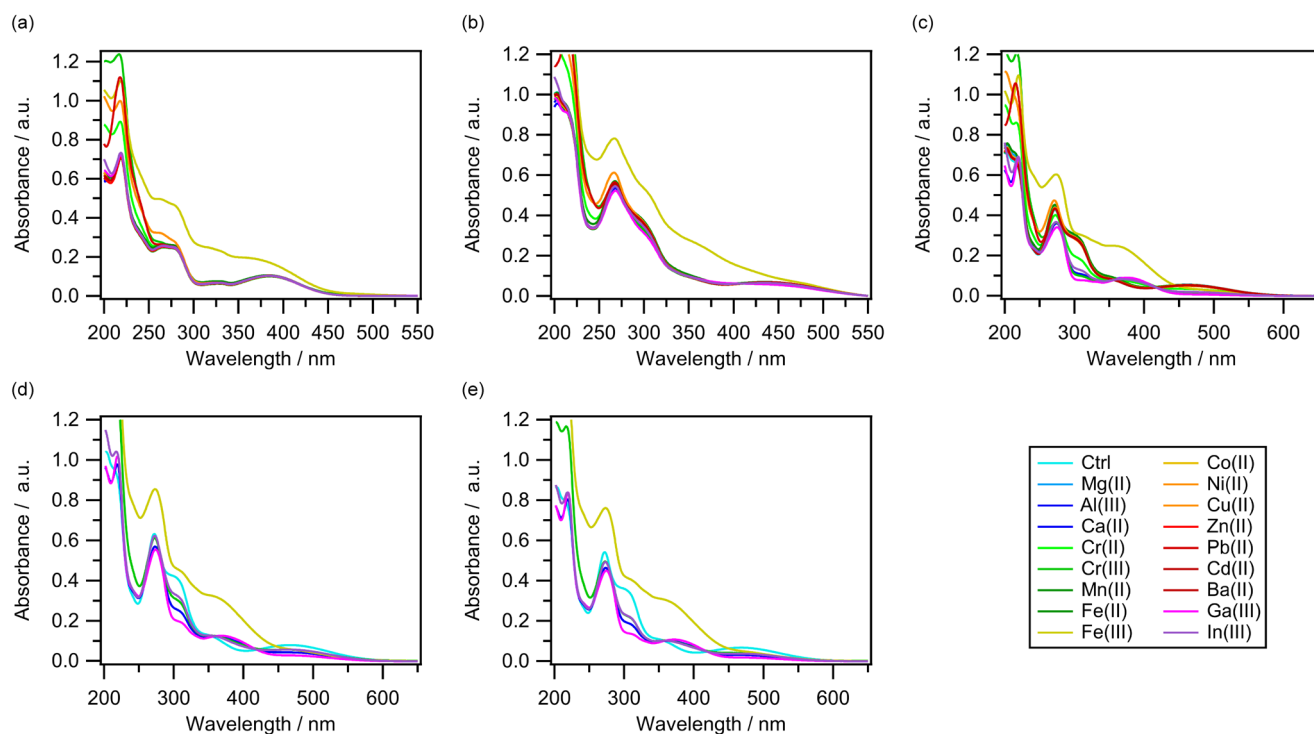

**Figure S6.** Absorption spectral changes of INA-Ph (a), -DMA (b), -DEA (c), -DPA (d), and -DBA (e) solutions (20  $\mu$ M) upon additions of di- and trivalent ions (5 equivalent).

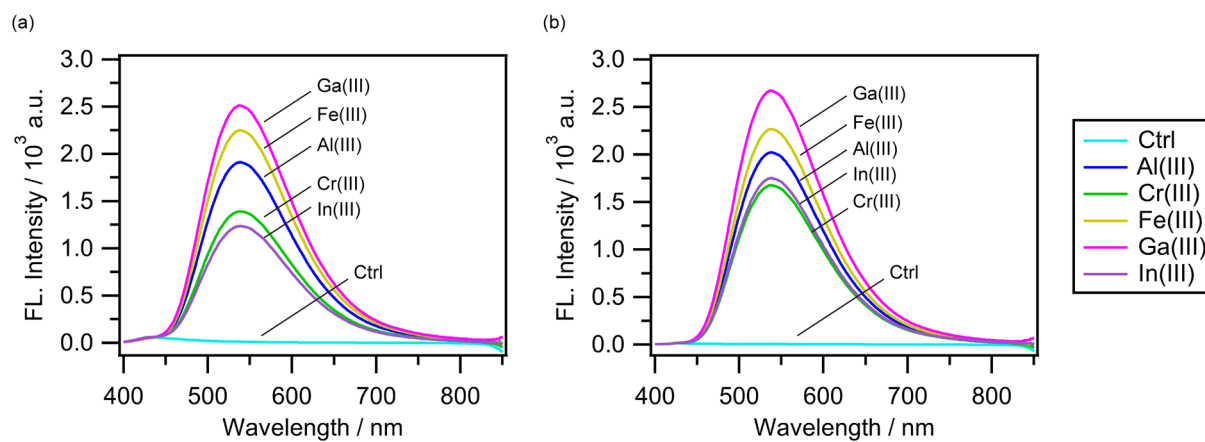

**Figure S7.** Fluorescence spectral changes of INA-DPA (a), and -DBA (b) solutions (20  $\mu$ M) upon additions of di- and trivalent ions (5 equivalent).

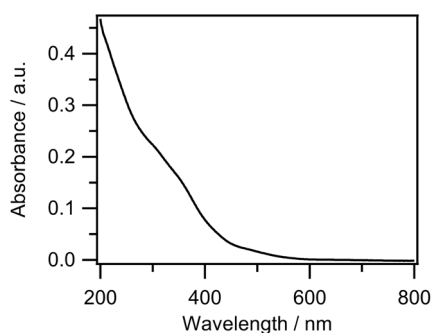

**Figure S8.** Absorption spectrum of Fe<sup>III</sup> solution (100  $\mu$ M).

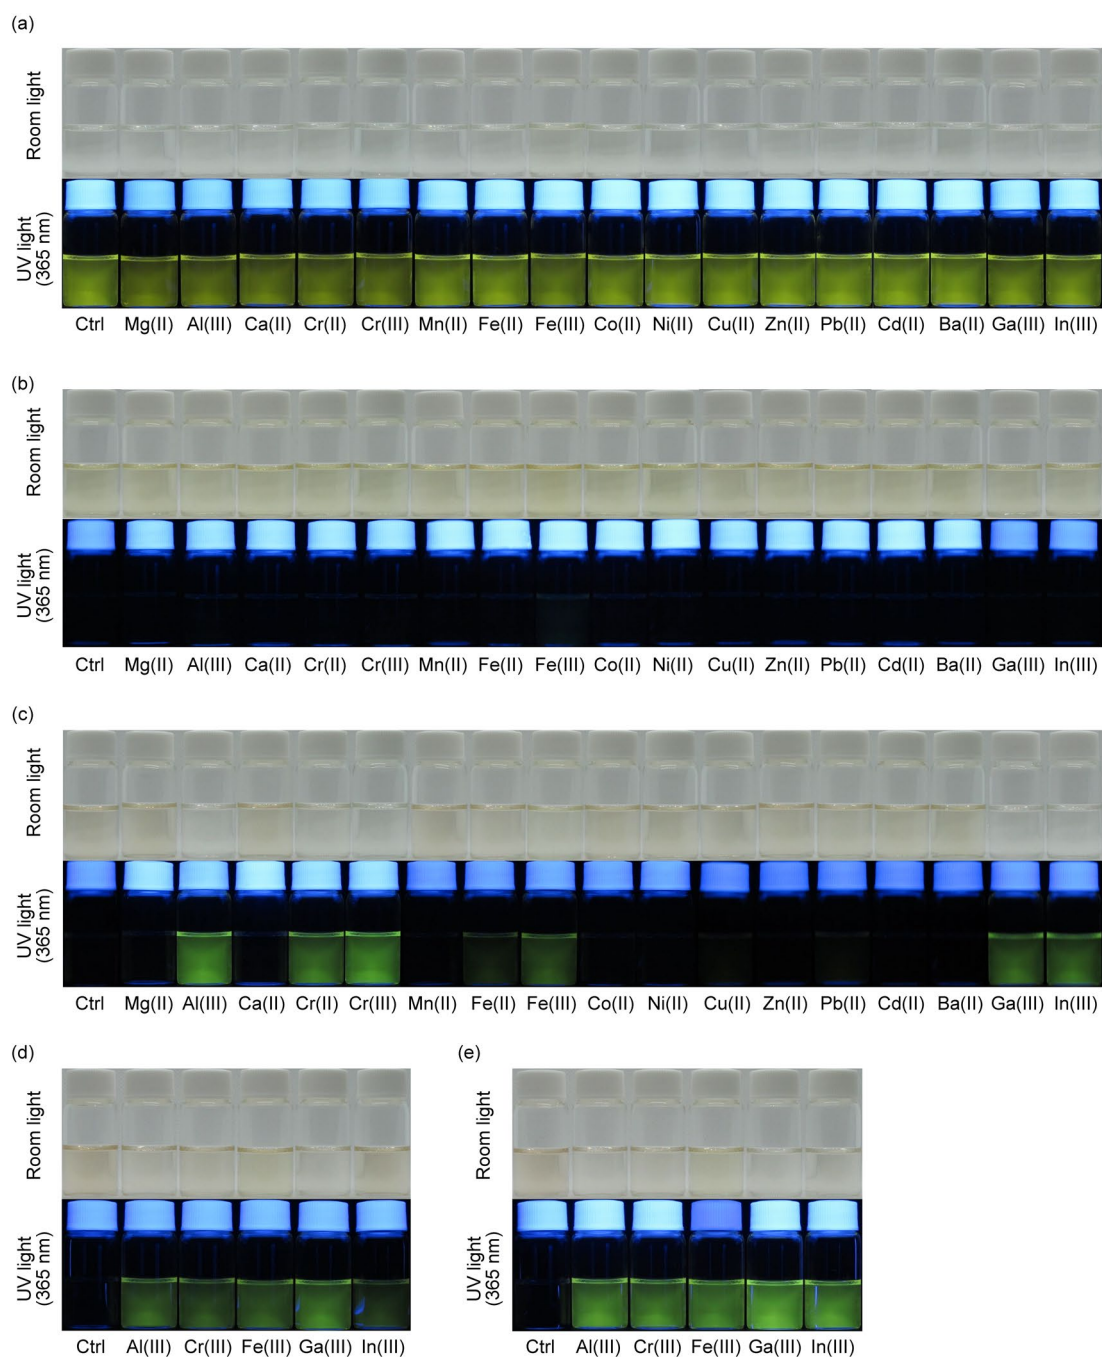

**Figure S9.** Pictures of **INA-Ph** (a), **-DMA** (b), **-DEA** (c), **-DPA** (d), and **-DBA** (e) solutions in vials under room light and UV light (365 nm) upon additions of the given di- and trivalent ions.

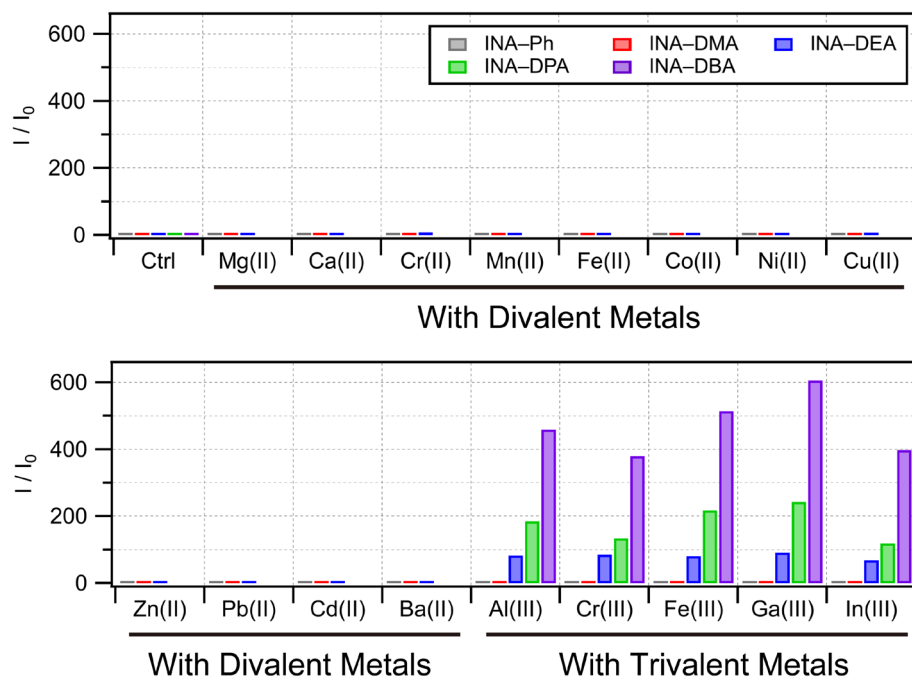

**Figure S10.** Fluorescence intensity (550 nm) of **INA** analogue solutions (20  $\mu\text{M}$ ) upon additions of di- and trivalent ions (5 equivalent).

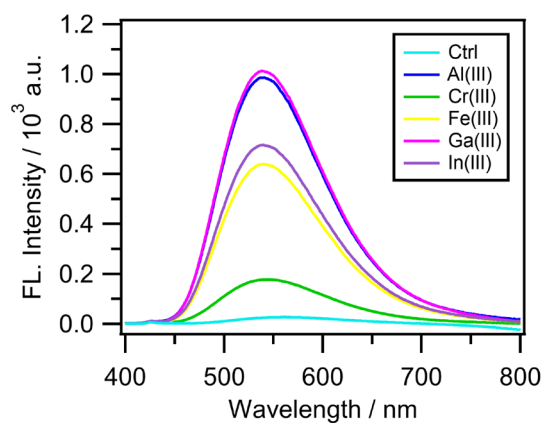

**Figure S11.** Fluorescence emission spectra of **INA-DEA** solutions (20  $\mu\text{M}$ ) upon addition of the given tri- and divalent metal ions (0.5 equivalents).

## The competition assessments of the trivalent ions against the divalent ions

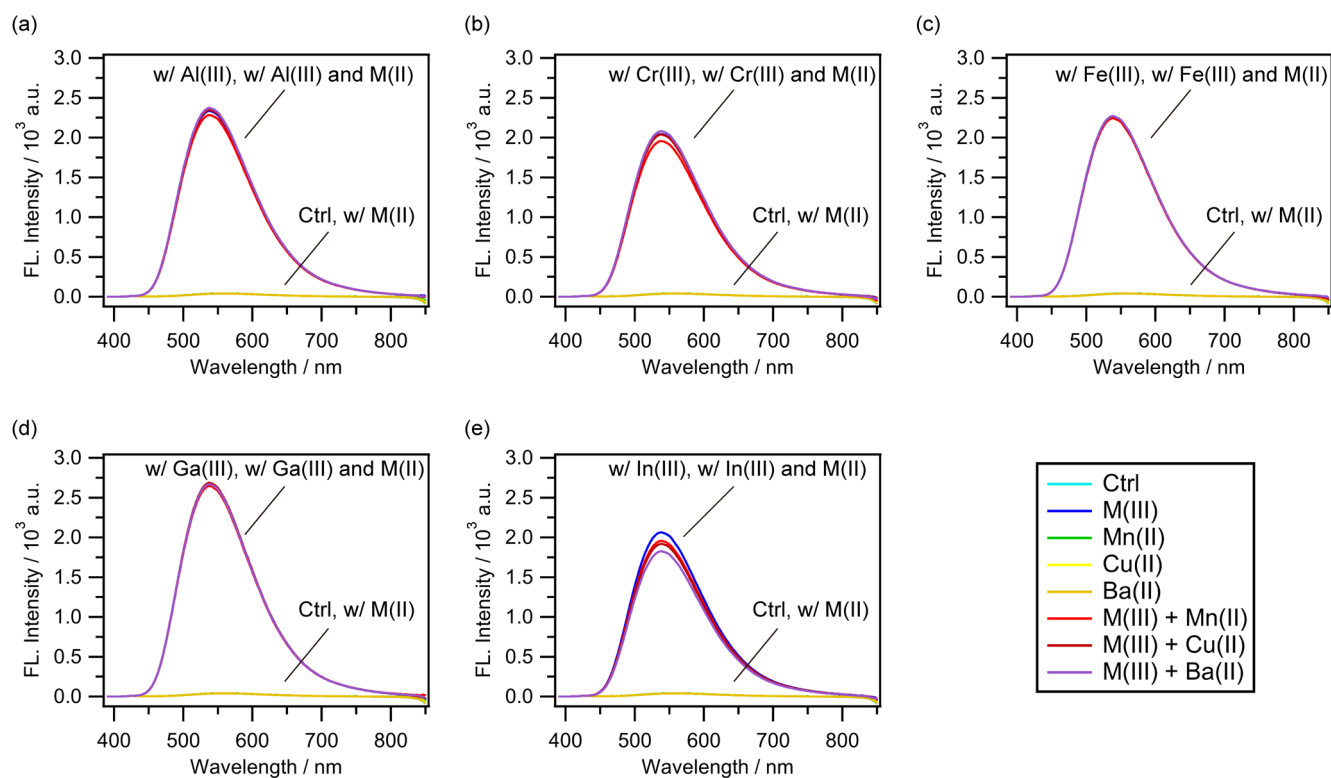

**Figure S12.** Fluorescence spectral changes of **INA-DEA** solutions (20  $\mu$ M) with Al<sup>III</sup> (100  $\mu$ M) (a), Cr<sup>III</sup> (100  $\mu$ M) (b), Fe<sup>III</sup> (100  $\mu$ M) (c), Ga<sup>III</sup> (100  $\mu$ M) (d), and In<sup>III</sup> (100  $\mu$ M) (e) in the presence of different divalent ions (100  $\mu$ M).

## X-Ray Crystallography Data

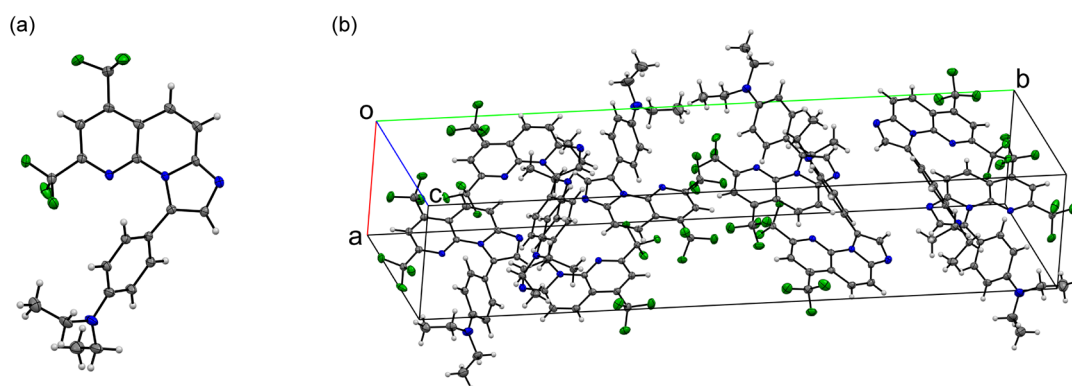

**Figure S13.** (a) ORTEP drawing (50% probability) of **INA-DEA** and (b) its molecular packings. The gray, blue, green, and white colors indicate C, N, F, and H atoms, respectively. Single red plate-shaped crystals of **INA-DEA** were obtained by recrystallisation from MeOH at rt. A suitable crystal  $0.145 \times 0.135 \times 0.091 \text{ mm}^3$  was selected and mounted on a suitable support on an diffractometer.

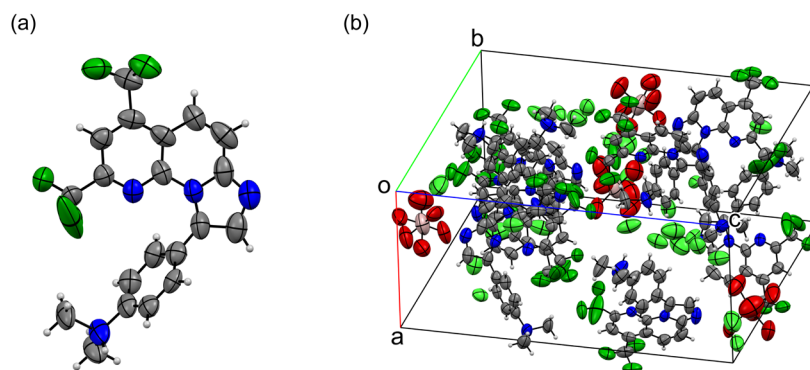

**Figure S14.** (a) ORTEP drawing (50% probability) of  $[\text{Al}^{\text{III}}(\text{H}_2\text{O})_6][\text{INA-DMA-H}]^{+2}\text{Cl}_5$  and (b) its molecular packings. The gray, blue, green, red, pink and white coloured atoms indicate C, N, F, O, Al and H atoms, respectively. Single yellow block-shaped crystals of  $[\text{Al}^{\text{III}}(\text{H}_2\text{O})_6][\text{INA-DMA-H}]^{+2}\text{Cl}_5$  were obtained by recrystallisation from MeOH solution of  $\text{AlCl}_3$  at rt. A suitable crystal  $0.165 \times 0.063 \times 0.051 \text{ mm}^3$  was selected and mounted on a suitable support on an diffractometer.

**Table S6.** Crystal data and structure refinement for **INA-DEA** and  $[\text{Al}^{\text{III}}(\text{H}_2\text{O})_6 [\text{INA-DMA-H}]^+_2]\text{Cl}_5$ .

| Compound                                       | <b>INA-DEA</b>                                                 | $[\text{Al}^{\text{III}}(\text{H}_2\text{O})_6 [\text{INA-DMA-H}]^+_2]\text{Cl}_5$ |
|------------------------------------------------|----------------------------------------------------------------|------------------------------------------------------------------------------------|
| Empirical formula                              | $\text{C}_{22}\text{H}_{18}\text{F}_6\text{N}_4$               | $\text{C}_{40}\text{H}_{30}\text{N}_8\text{O}_6\text{F}_{12}\text{AlCl}_5$         |
| Formula weight                                 | 452.40                                                         | 1150.95                                                                            |
| Temperature/K                                  | 93                                                             | 93(2)                                                                              |
| Crystal system                                 | monoclinic                                                     | orthorhombic                                                                       |
| Space group                                    | $P2_1$                                                         | $P2_12_12_1$                                                                       |
| a/Å                                            | 7.65252(5)                                                     | 10.67650(10)                                                                       |
| b/Å                                            | 36.6358(2)                                                     | 21.5837(3)                                                                         |
| c/Å                                            | 14.87749(10)                                                   | 24.0601(3)                                                                         |
| $\alpha/^\circ$                                | 90                                                             | 90                                                                                 |
| $\beta/^\circ$                                 | 104.4686(7)                                                    | 90                                                                                 |
| $\gamma/^\circ$                                | 90                                                             | 90                                                                                 |
| Volume/Å <sup>3</sup>                          | 4038.71(5)                                                     | 5544.37(12)                                                                        |
| Z                                              | 8                                                              | 4                                                                                  |
| $\rho_{\text{calc}}/\text{cm}^3$               | 1.488                                                          | 1.379                                                                              |
| $\mu/\text{mm}^{-1}$                           | 1.123                                                          | 3.335                                                                              |
| F(000)                                         | 1856.0                                                         | 2320.0                                                                             |
| Crystal size/mm <sup>3</sup>                   | $0.145 \times 0.135 \times 0.091$                              | $0.165 \times 0.063 \times 0.051$                                                  |
| Radiation/ Å                                   | $\text{CuK}\alpha$ ( $\lambda = 1.54184$ )                     | $\text{CuK}\alpha$ ( $\lambda = 1.54184$ )                                         |
| 2 $\theta$ range for data collection/ $^\circ$ | 6.136 to 153.256                                               | 5.5 to 154.462                                                                     |
| Index ranges                                   | $-8 \leq h \leq 9, -43 \leq k \leq 44, -18 \leq l \leq 16$     | $-13 \leq h \leq 11, -26 \leq k \leq 26, -29 \leq l \leq 29$                       |
| Reflections collected                          | 22091                                                          | 22241                                                                              |
| Independent reflections                        | 12134 [ $R_{\text{int}} = 0.0228, R_{\text{sigma}} = 0.0291$ ] | 10123 [ $R_{\text{int}} = 0.0215, R_{\text{sigma}} = 0.0283$ ]                     |
| Data/restraints/parameters                     | 12134/1/1162                                                   | 10123/73/671                                                                       |
| Goodness-of-fit on $F^2$                       | 1.046                                                          | 1.676                                                                              |
| Final R indexes [ $I \geq 2\sigma(I)$ ]        | $R_1 = 0.0311, wR_2 = 0.0838$                                  | $R_1 = 0.1270, wR_2 = 0.3682$                                                      |
| Final R indexes [all data]                     | $R_1 = 0.0320, wR_2 = 0.0844$                                  | $R_1 = 0.1387, wR_2 = 0.3879$                                                      |
| Largest diff. peak/hole / $e \text{ \AA}^{-3}$ | 0.32/-0.22                                                     | 0.85/-0.81                                                                         |
| Flack parameter                                | -0.01(3)                                                       | 0.105(10)                                                                          |



## IR Spectra

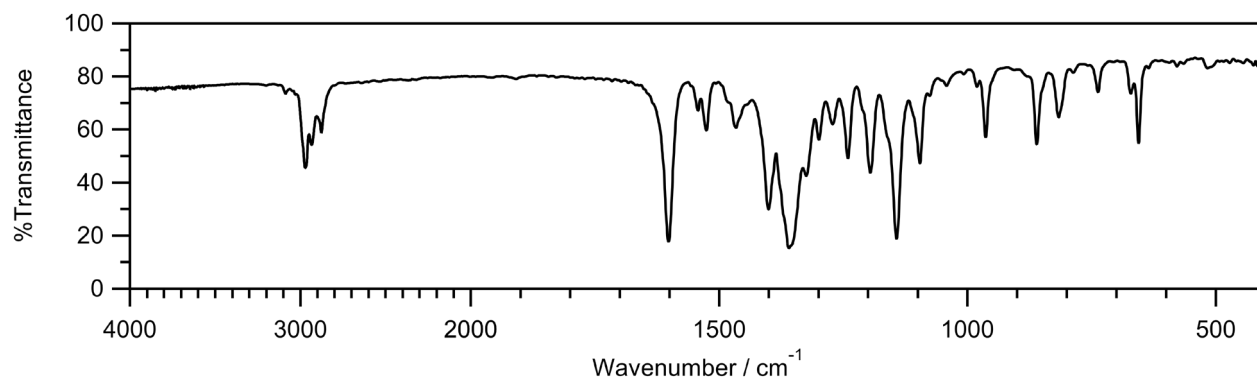

Figure S15. IR spectrum (KBr) of 1.

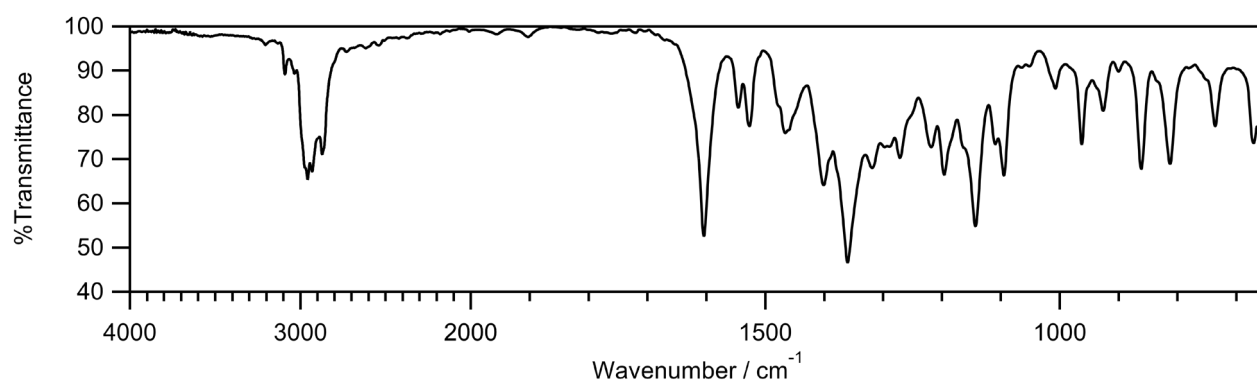

Figure S16. IR spectrum (NaCl) of 2.

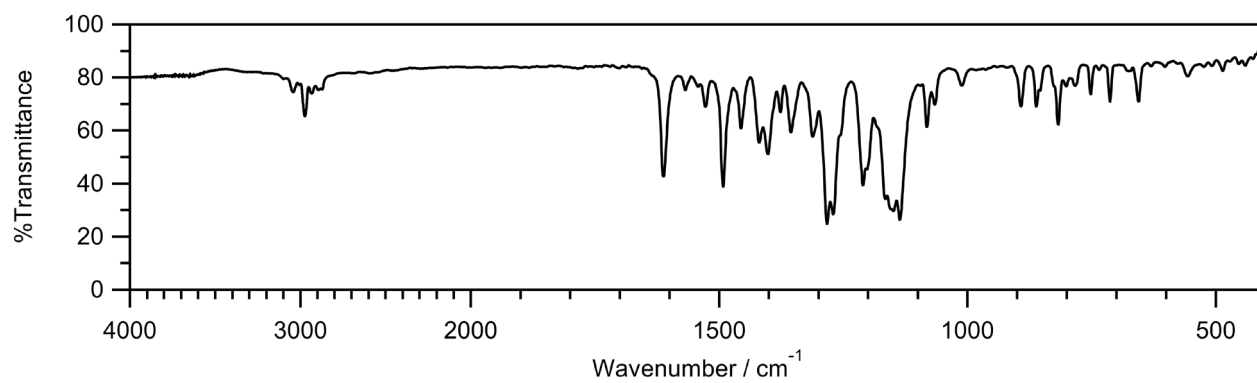

Figure S17. IR spectrum (KBr) of INA-DEA.

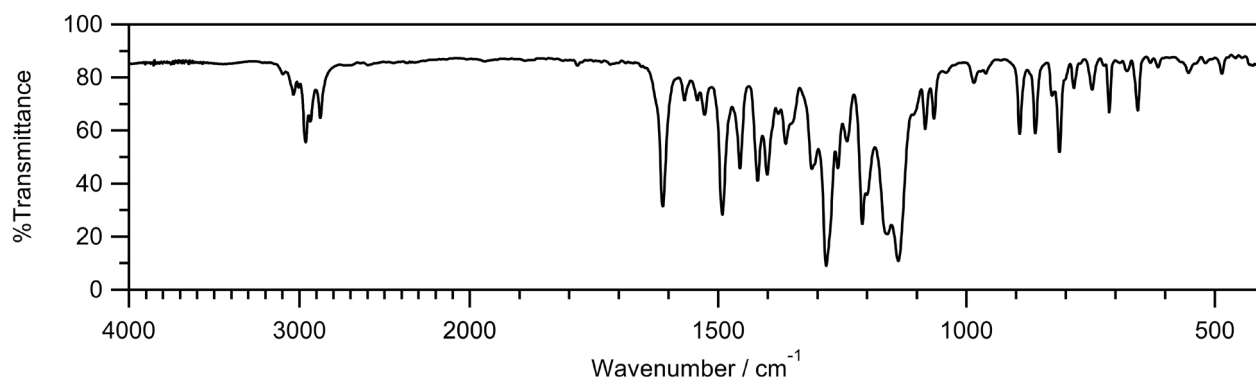

**Figure S18.** IR spectrum (KBr) of **INA-DPA**.

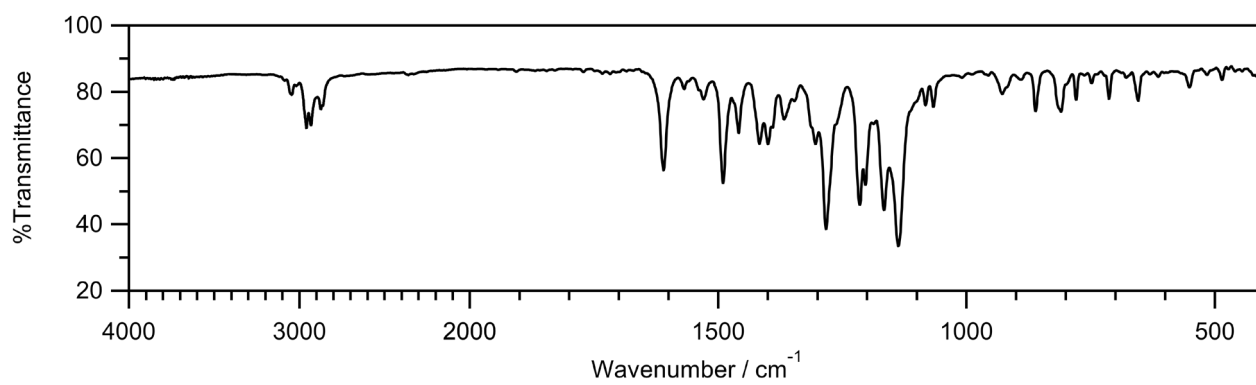

**Figure S19.** IR spectrum (KBr) of **INA-DBA**.

## NMR Spectra

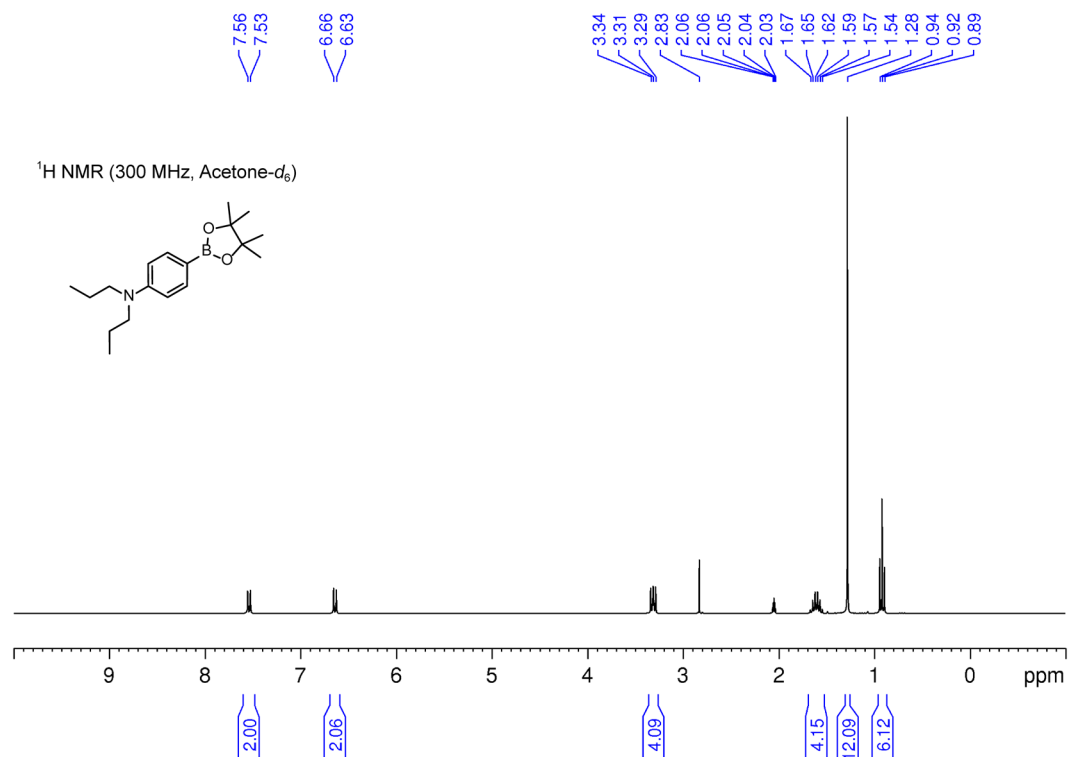

Figure S20. <sup>1</sup>H NMR spectrum (300 MHz) of 1 in Acetone-*d*<sub>6</sub>.

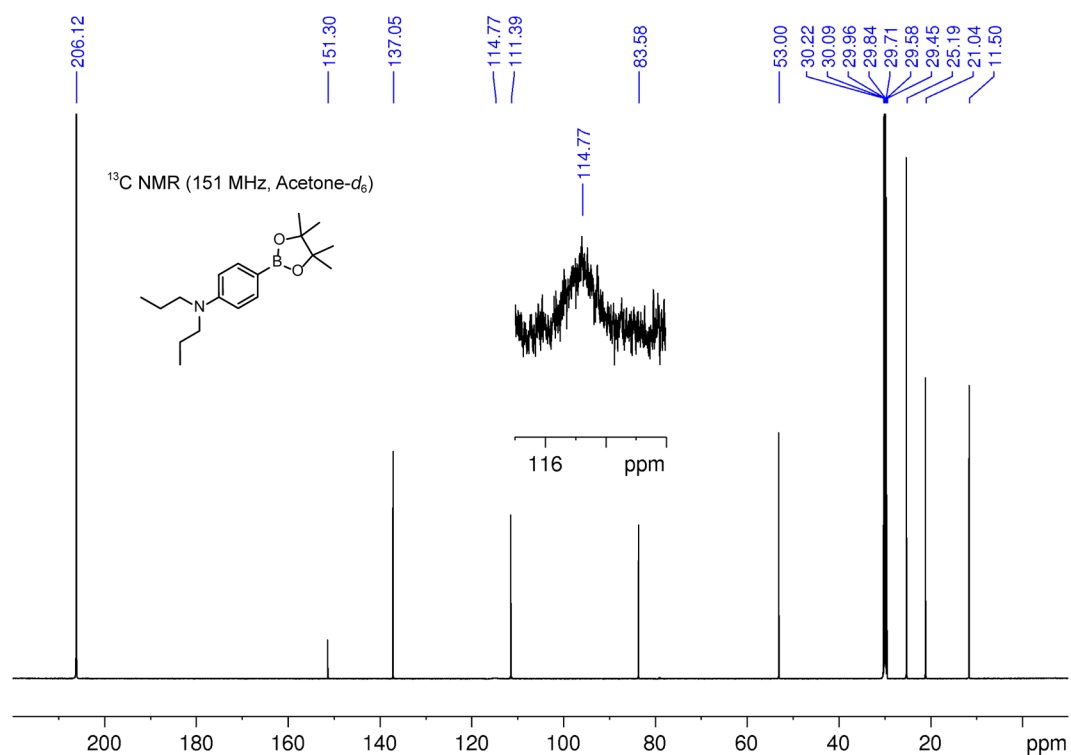

Figure S21. <sup>13</sup>C NMR spectrum (151 MHz) of 1 in Acetone-*d*<sub>6</sub>.

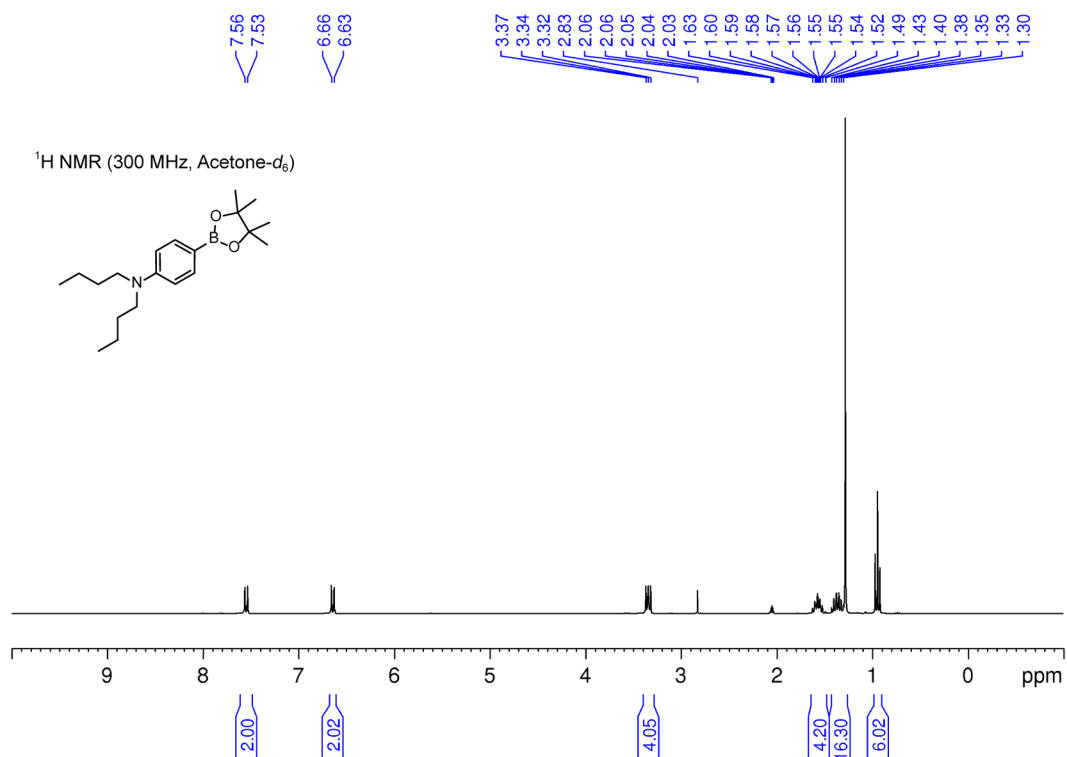

Figure S22. <sup>1</sup>H NMR spectrum (300 MHz) of **2** in Acetone-*d*<sub>6</sub>.

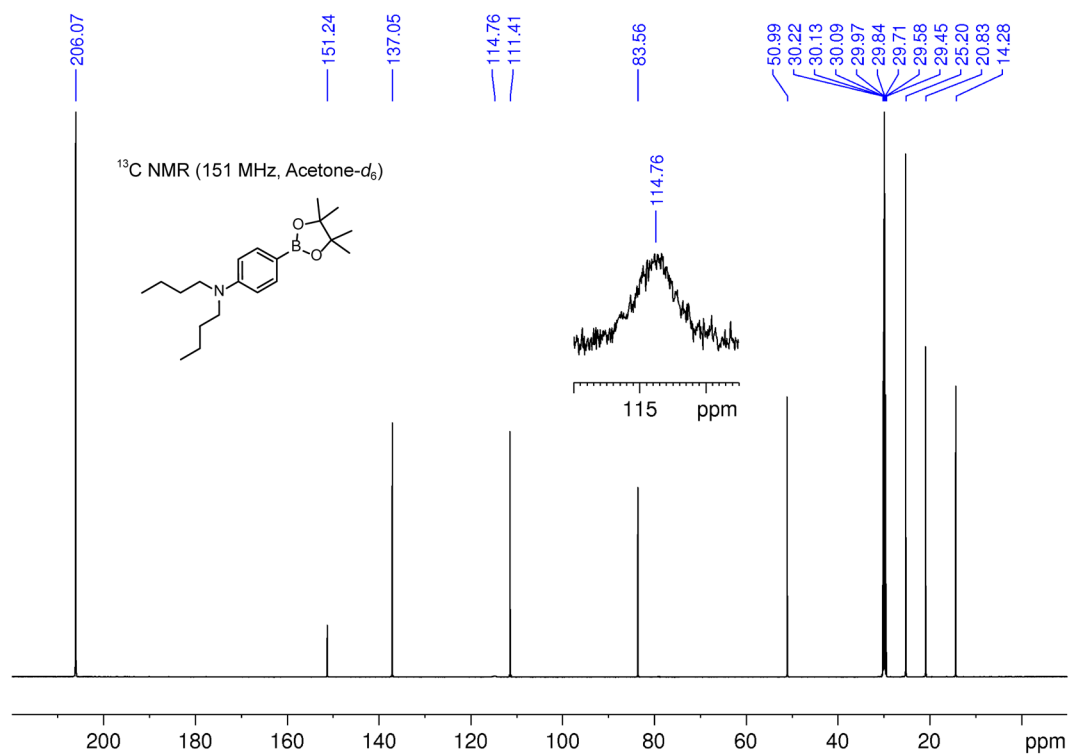

Figure S23. <sup>13</sup>C NMR spectrum (151 MHz) of **2** in Acetone-*d*<sub>6</sub>.

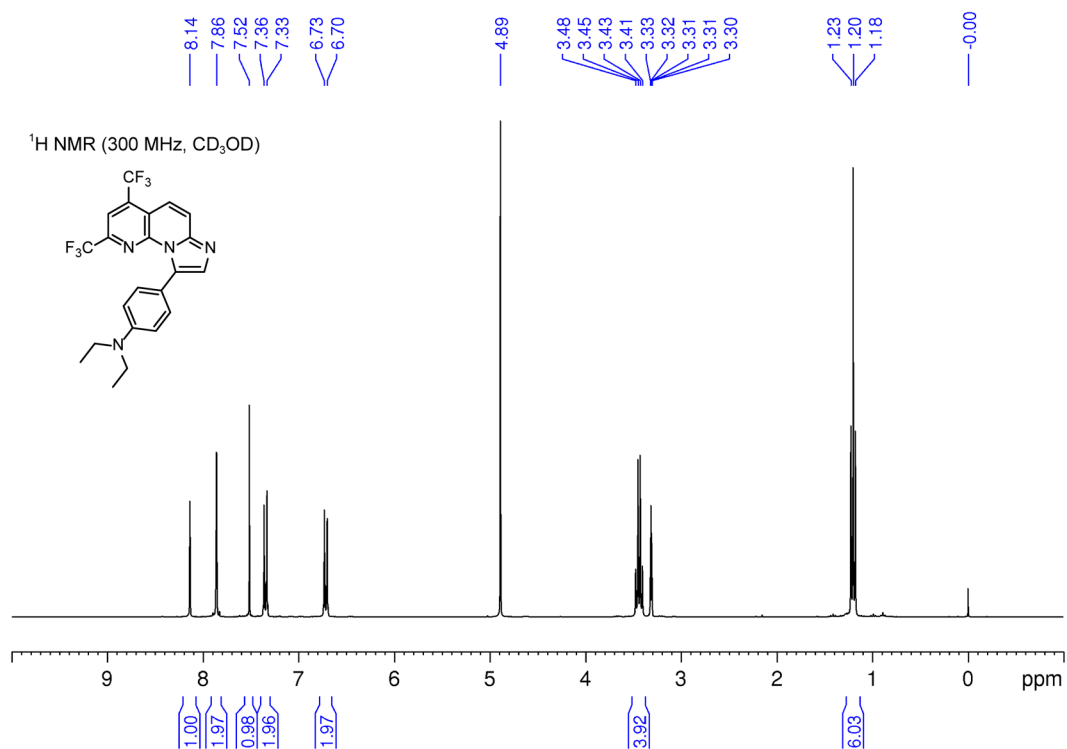

Figure S24. <sup>1</sup>H NMR spectrum (300 MHz) of **INA-DEA** in CD<sub>3</sub>OD.

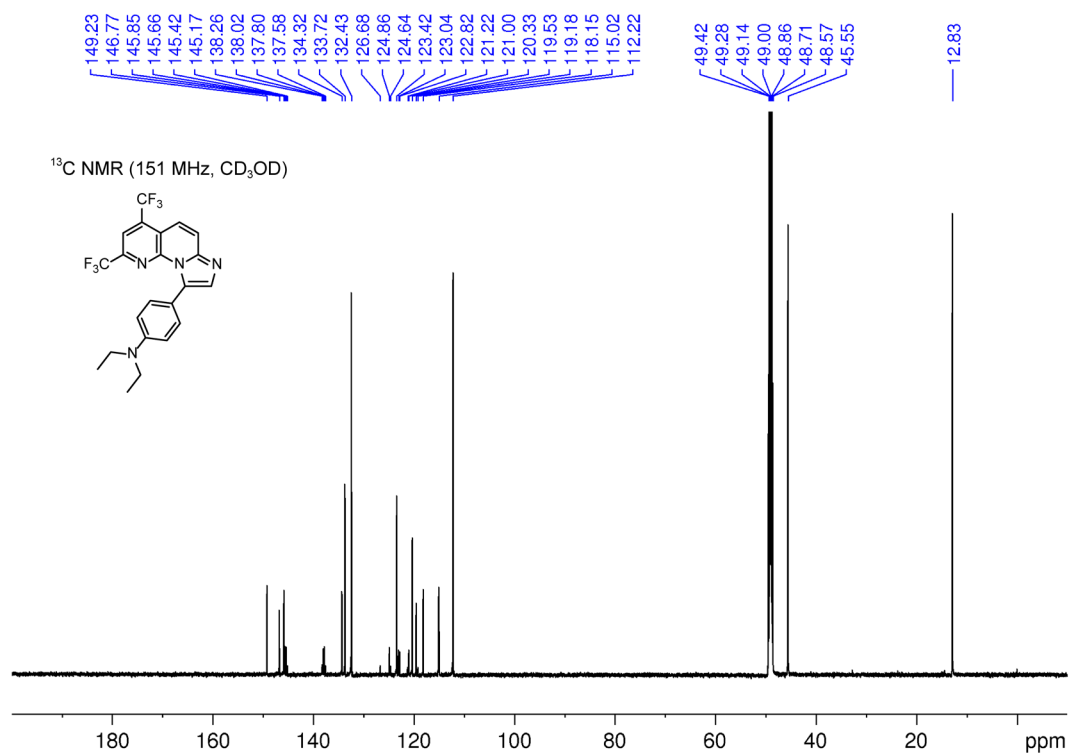

Figure S25. <sup>13</sup>C NMR spectrum (151 MHz) of **INA-DEA** in CD<sub>3</sub>OD.

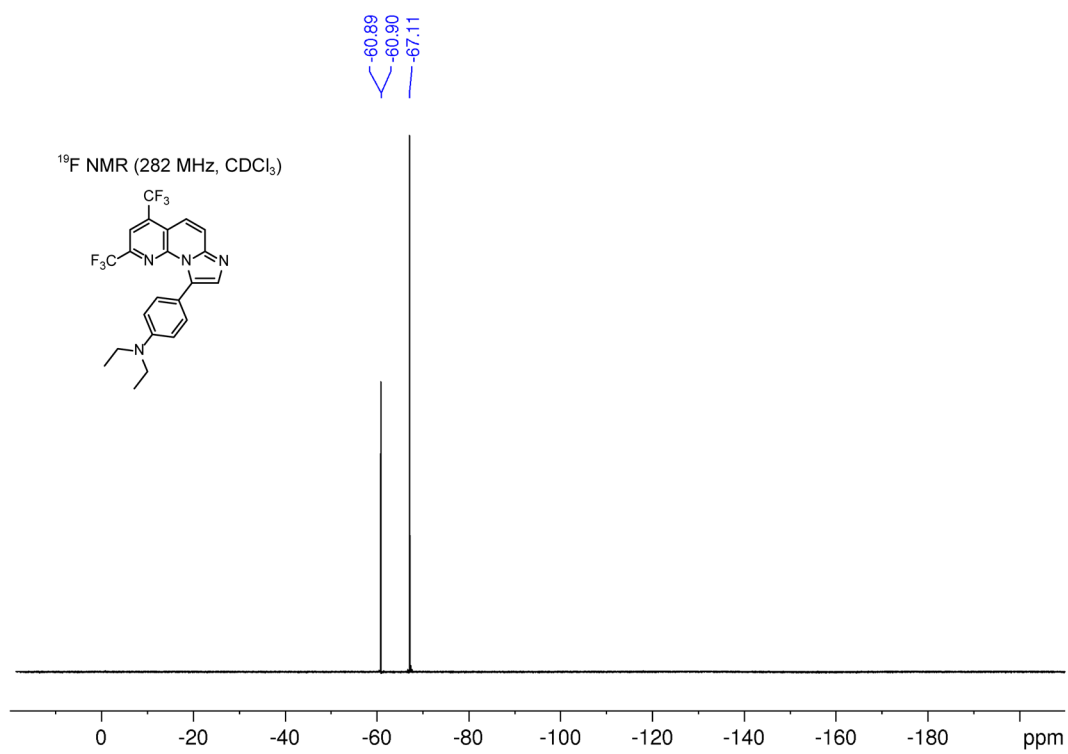

**Figure S26.** <sup>19</sup>F NMR spectrum (282 MHz) of **INA-DEA** in CDCl<sub>3</sub>.

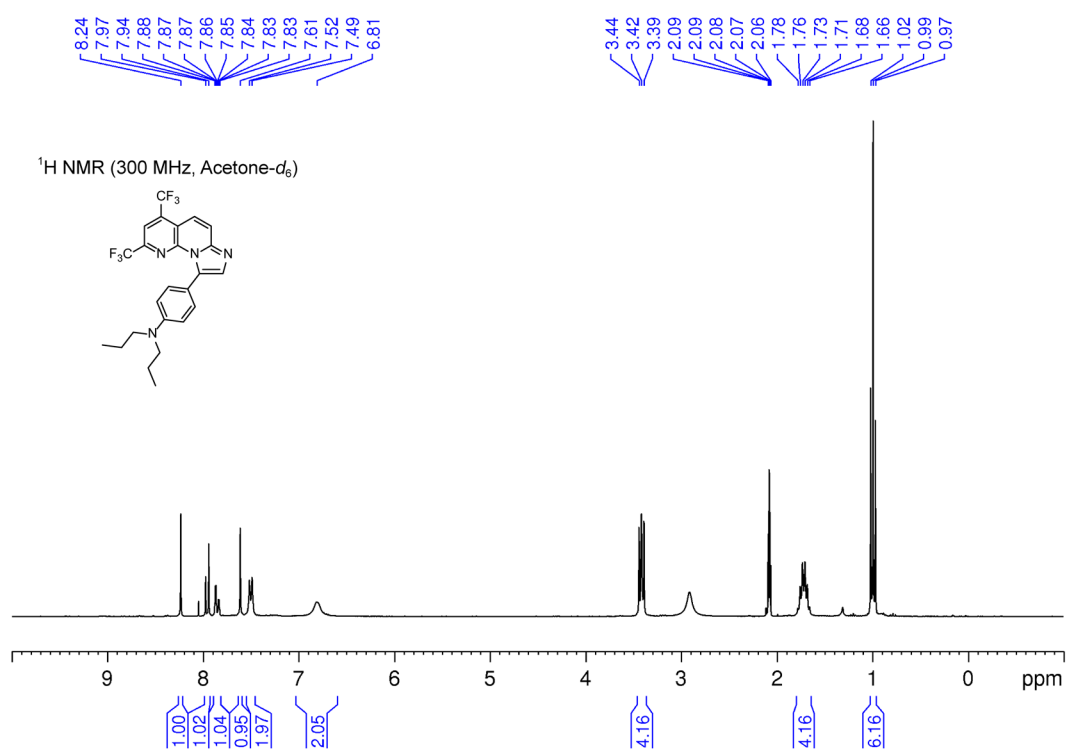

Figure S27. <sup>1</sup>H NMR spectrum (300 MHz) of INA-DPA in Acetone-d<sub>6</sub>.

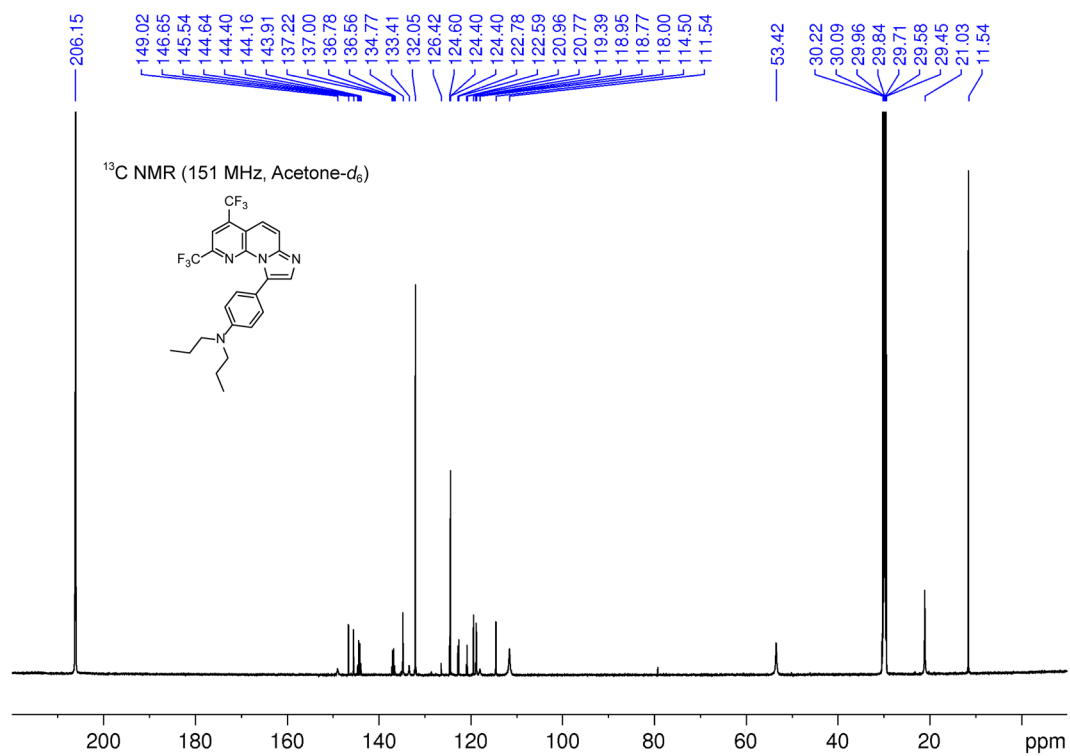

Figure S28. <sup>13</sup>C NMR spectrum (151 MHz) of INA-DPA in Acetone-d<sub>6</sub>.

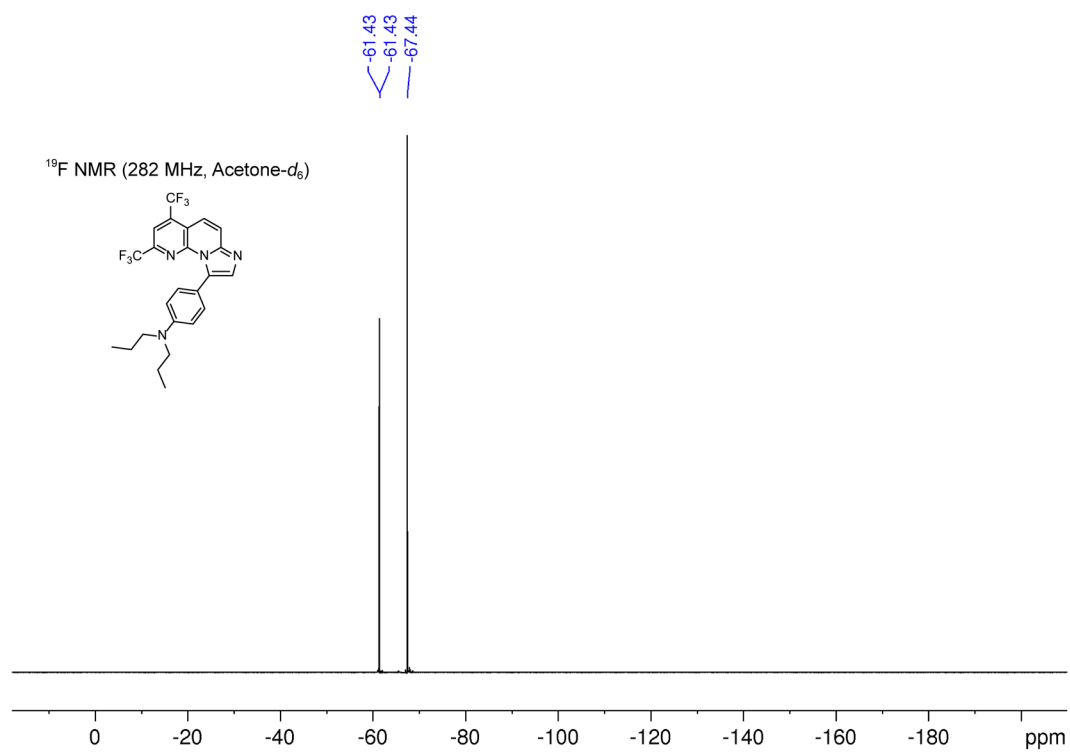

**Figure S29.** <sup>19</sup>F NMR spectrum (282 MHz) of **INA-DPA** in Acetone-*d*<sub>6</sub>.



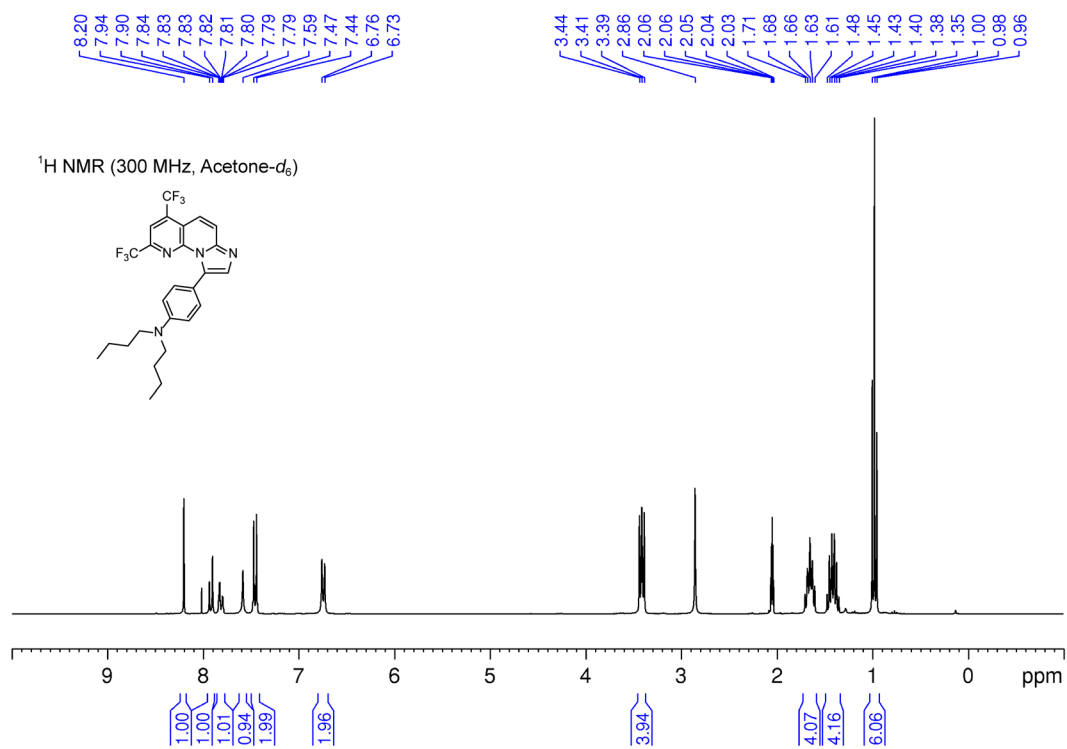

Figure S30. <sup>1</sup>H NMR spectrum (300 MHz) of INA-DBA in Acetone-d<sub>6</sub>.

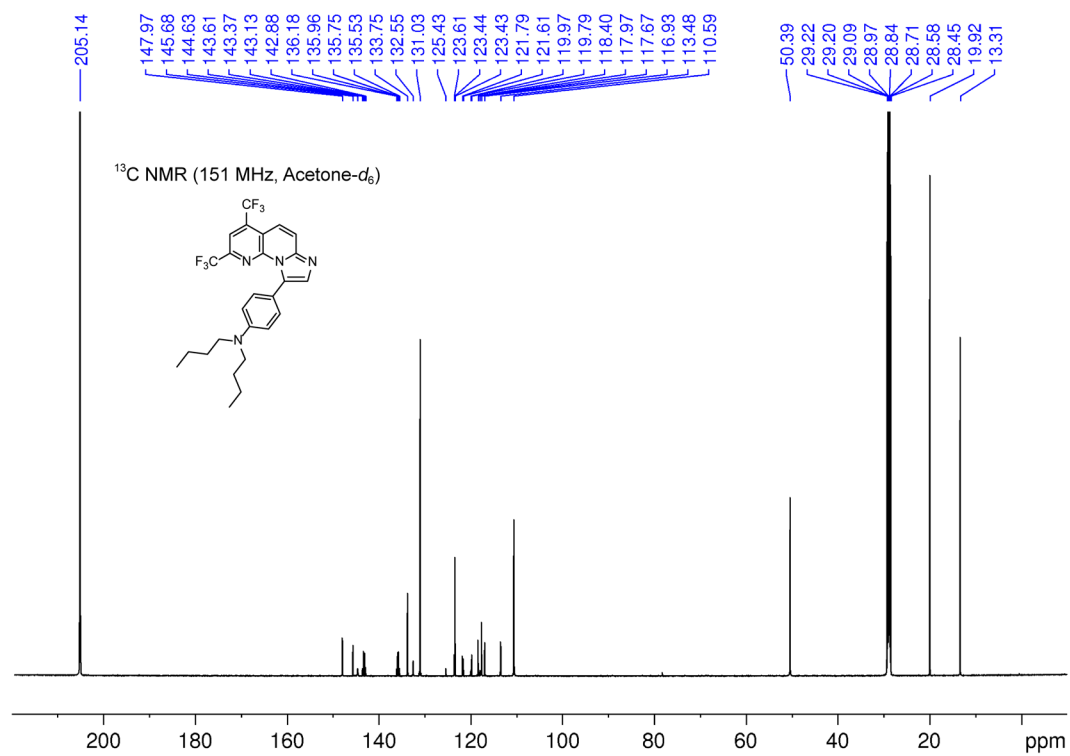

Figure S31. <sup>13</sup>C NMR spectrum (151 MHz) of INA-DBA in Acetone-d<sub>6</sub>.

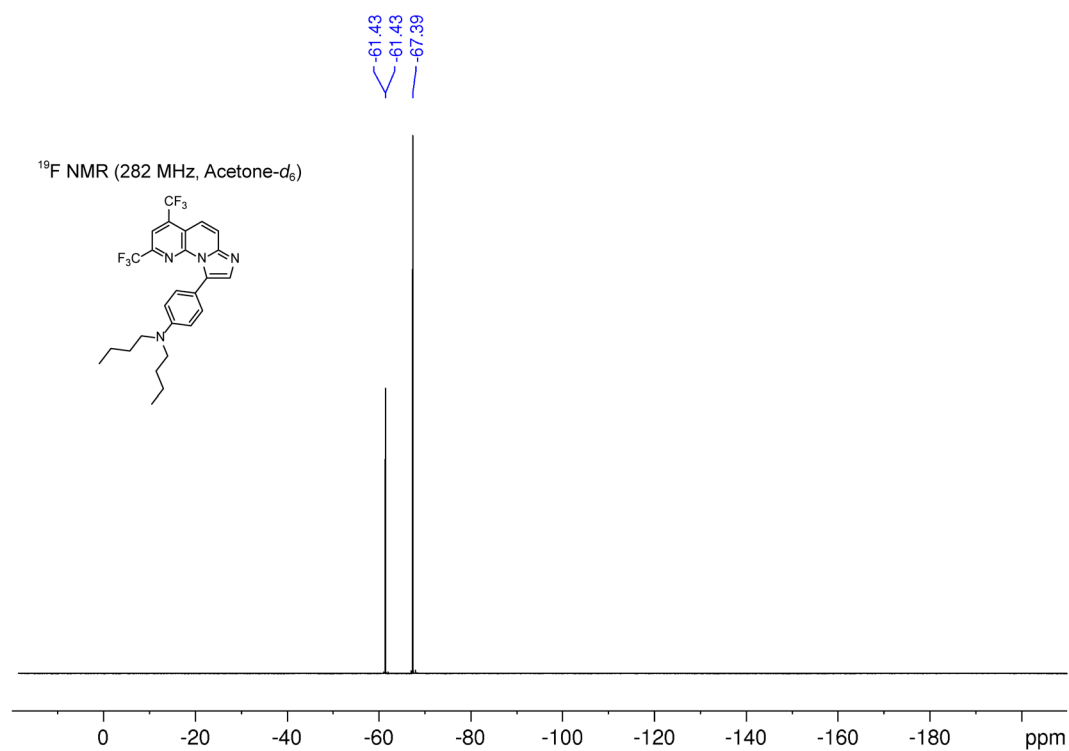

Figure S32. <sup>19</sup>F NMR spectrum (282 MHz) of INA-DBA in Acetone-*d*<sub>6</sub>.

## References

- [1] G. M. Sheldrick, *Acta Crystallogr A Found Adv* **2015**, *71*, 3–8.
- [2] O. V. Dolomanov, L. J. Bourhis, R. J. Gildea, J. A. K. Howard, H. Puschmann, *J. Appl. Crystallogr.* **2009**, *42*, 339–341.
- [3] G. M. Sheldrick, *Acta Crystallogr. B* **2015**, *71*, 3–8.
- [4] S. Matsumoto, T. Umeno, K. Usui, S. Karasawa, *Cryst. Growth Des.* **2021**, *21*, 5251–5260.
- [5] J. W. Tomsho, A. Pal, D. G. Hall, S. J. Benkovic, *ACS Med. Chem. Lett.* **2012**, *3*, 48–52.
- [6] N. Harada, Y. Abe, S. Karasawa, N. Koga, *Org. Lett.* **2012**, *14*, 6282–6285.
- [7] S. Huang, J. Qing, S. Wang, H. Wang, L. Zhang, Y. Tang, *Org. Biomol. Chem.* **2014**, *12*, 2344–2348.
